# Supplementary material for: The necroptosis signature and molecular mechanism of lung squamous cell carcinoma
Source: Aging (Albany NY). 2023 Nov 15;15(22):12907–26. doi: 10.18632/aging.205210 (PMC10713426; doi:10.18632/aging.205210)
Supplement: Supplementary Figures [file aging-15-205210-s001.pdf]

## SUPPLEMENTARY FIGURES

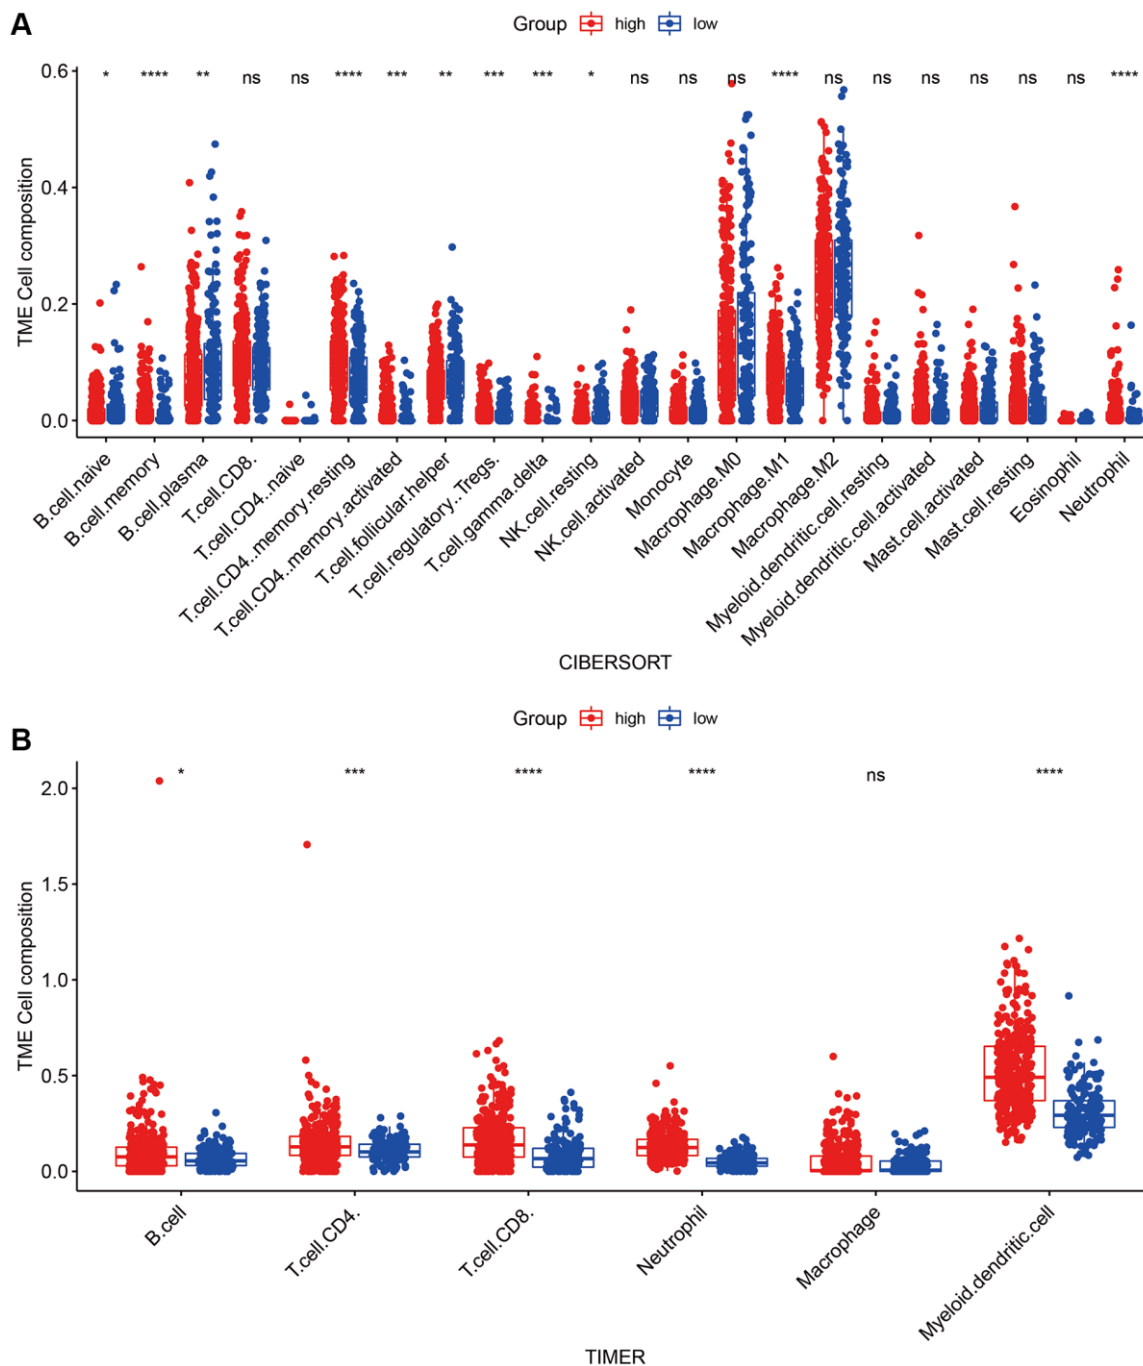

**Supplementary Figure 1.** The differences in immune cell infiltration between the high-risk and low-risk groups according to the CIBERSORT (A) and TIMER algorithms (B). (\* $p < 0.05$ ; \*\* $p < 0.01$ ; \*\*\* $p < 0.001$ ; \*\*\*\* $p < 0.0001$ ; ns  $p > 0.05$ ).

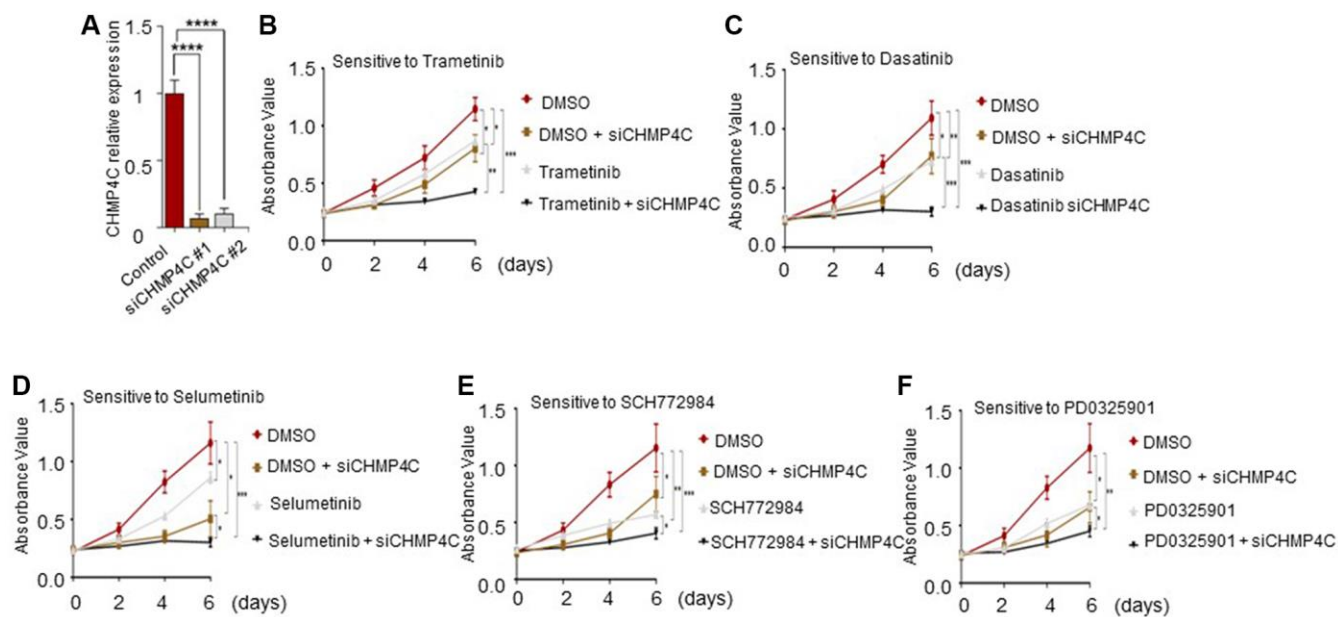

**Supplementary Figure 2. Effect of the candidate drugs on CHMP4C knockdown cells.** (A) CHMP4C expression in the control and siCHMP4C groups. (B–F) Viability of the cells in response to (B) trametinib, (C) dasatinib, (D) selumetinib, (E) SCH772984 and (F) PD0325901.

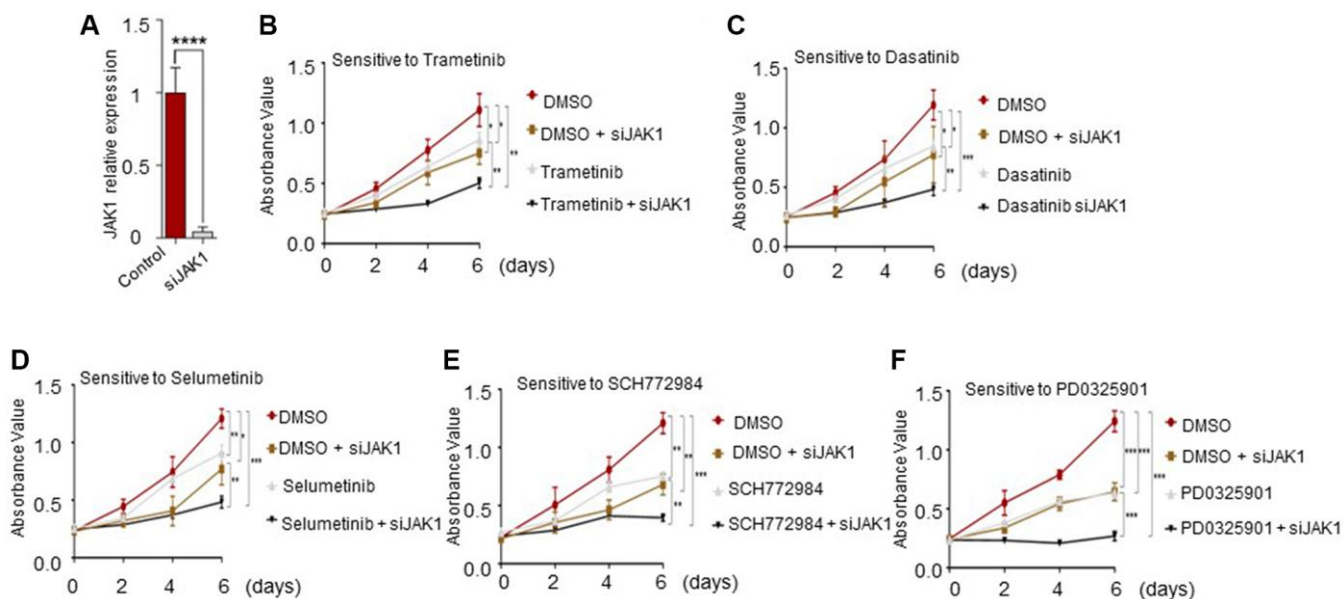

**Supplementary Figure 3. Effect of the candidate drugs on JAK1 knockdown cells.** (A) JAK1 expression in the control and siJAK1 groups. (B–F) Viability of the cells in response to (B) trametinib, (C) dasatinib, (D) selumetinib, (E) SCH772984 and (F) PD0325901.

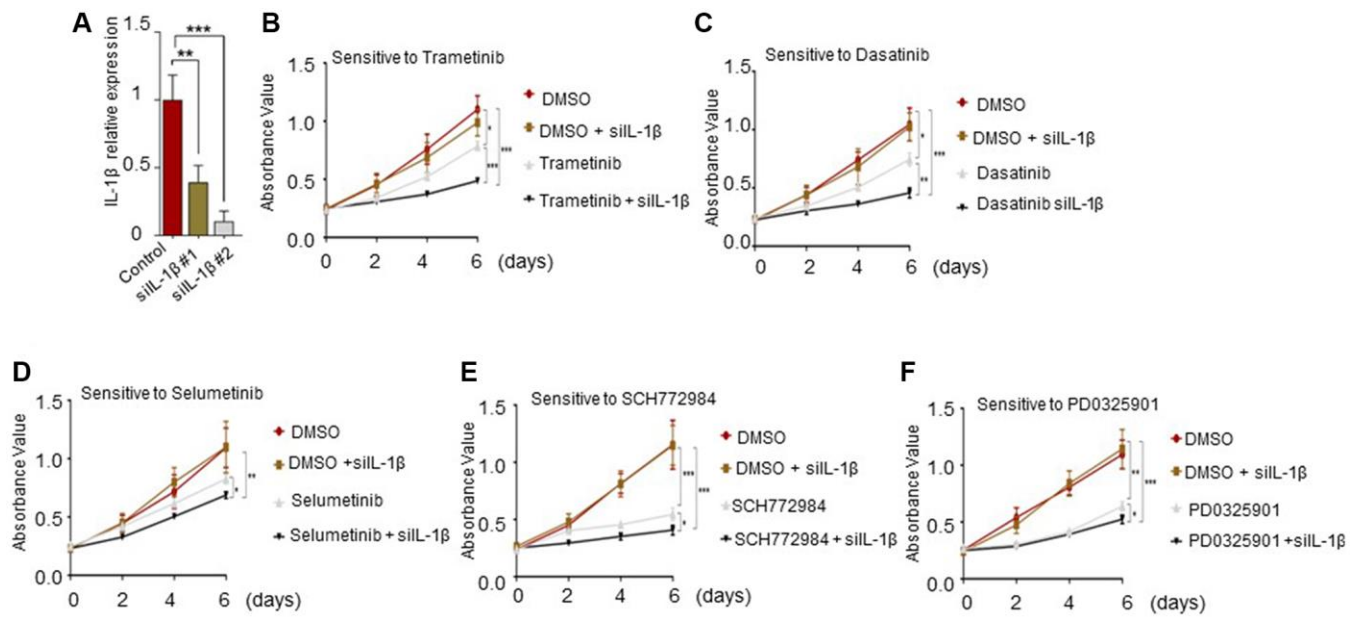

**Supplementary Figure 4. Effect of the candidate drugs on IL- $\beta$  knockdown cells.** (A) IL- $\beta$  expression in the control and siIL- $\beta$  groups. (B–F) Viability of the cells in response to (B) trametinib, (C) dasatinib, (D) selumetinib, (E) SCH772984 and (F) PD0325901.
