# Supplementary material for: The necroptosis signature and molecular mechanism of lung squamous cell carcinoma
Source: Aging (Albany NY). 2023 Nov 15;15(22):12907–26. doi: 10.18632/aging.205210 (PMC10713426; doi:10.18632/aging.205210)
Supplement: Supplementary Table 1 [file aging-15-205210-s002.xlsx]

## Sheet: Sheet1
Supplementary Table 1. TCGA_LUSC necroptosis score.
	KEGG_Necroptosis_pathway
TCGA-18-3417-01	2.19052
TCGA-22-4613-01	2.04898
TCGA-90-7769-01	2.0211
TCGA-77-A5G1-01	2.14357
TCGA-77-A5G3-01	1.91061
TCGA-66-2766-01	2.03263
TCGA-37-4135-01	1.99915
TCGA-56-8201-01	2.41403
TCGA-56-7582-11	2.10856
TCGA-43-7656-01	2.07786
TCGA-85-8481-01	2.21605
TCGA-56-A4ZK-01	2.08512
TCGA-56-8309-11	2.34125
TCGA-22-1011-01	2.27899
TCGA-77-8156-01	2.0466
TCGA-43-A475-01	2.30593
TCGA-37-3789-01	2.34971
TCGA-22-4596-01	2.42037
TCGA-58-A46N-01	2.04361
TCGA-63-A5MW-01	1.5948
TCGA-85-8479-01	1.97726
TCGA-68-8251-01	2.20654
TCGA-34-7107-01	2.04289
TCGA-37-4141-01	1.92422
TCGA-39-5040-01	1.96779
TCGA-43-2578-01	1.80727
TCGA-63-A5M9-01	1.8706
TCGA-92-8063-01	2.0557
TCGA-NC-A5HR-01	1.96454
TCGA-51-4079-01	2.10605
TCGA-56-7730-11	2.27448
TCGA-66-2795-01	2.03249
TCGA-96-7544-01	2.09913
TCGA-21-1081-01	1.97241
TCGA-37-A5EM-01	2.12641
TCGA-63-6202-01	2.1854
TCGA-98-A53I-01	2.12891
TCGA-46-3767-01	2.1734
TCGA-22-4599-01	2.18035
TCGA-58-8391-01	2.0595
TCGA-85-8580-01	1.9349
TCGA-60-2715-01	2.23453
TCGA-43-6143-11	2.31349
TCGA-39-5031-01	2.05368
TCGA-66-2792-01	1.88335
TCGA-92-7340-01	2.22335
TCGA-85-8287-01	2.20745
TCGA-56-8622-01	2.10649
TCGA-22-5471-01	2.29103
TCGA-60-2709-11	2.43114
TCGA-77-A5GA-01	1.99644
TCGA-43-3394-11	2.27913
TCGA-85-A4QQ-01	2.07951
TCGA-66-2744-01	2.33408
TCGA-22-5480-01	2.22913
TCGA-58-8388-01	1.97614
TCGA-63-7022-01	2.11478
TCGA-85-8584-01	2.24235
TCGA-77-8128-01	1.73882
TCGA-60-2708-01	1.99502
TCGA-85-7699-01	2.09577
TCGA-33-AAS8-01	1.96336
TCGA-51-4081-11	2.40366
TCGA-18-3408-01	2.12981
TCGA-56-8626-01	2.01713
TCGA-22-4601-01	1.94272
TCGA-43-6773-01	2.20391
TCGA-22-5482-11	2.28216
TCGA-60-2706-01	2.02297
TCGA-77-A5G8-01	1.92656
TCGA-85-8355-01	2.27405
TCGA-22-4609-11	2.31516
TCGA-22-4593-01	2.0089
TCGA-60-2712-01	2.33947
TCGA-85-7843-01	1.99312
TCGA-66-2790-01	2.22306
TCGA-NC-A5HE-01	2.2919
TCGA-33-4547-01	2.08897
TCGA-34-5240-01	1.93319
TCGA-63-5131-01	2.1302
TCGA-66-2758-01	2.12159
TCGA-85-A50M-01	2.02986
TCGA-22-5489-11	2.2543
TCGA-NC-A5HI-01	1.92896
TCGA-77-8009-01	2.00235
TCGA-43-A56U-01	2.26188
TCGA-68-A59J-01	2.1563
TCGA-34-5236-01	1.97868
TCGA-22-1002-01	2.20477
TCGA-NK-A5D1-01	1.71598
TCGA-51-4080-01	1.99005
TCGA-33-6737-01	2.15086
TCGA-56-7223-01	1.56544
TCGA-39-5011-01	2.20784
TCGA-39-5037-01	1.86303
TCGA-66-2777-01	2.07661
TCGA-21-5783-01	1.79429
TCGA-85-7950-01	2.26009
TCGA-77-8153-01	1.74325
TCGA-L3-A4E7-01	2.27065
TCGA-60-2724-01	2.18246
TCGA-90-A59Q-01	2.39379
TCGA-94-7557-01	2.00691
TCGA-96-7545-01	2.07283
TCGA-85-6798-01	1.74218
TCGA-22-5491-11	2.21093
TCGA-98-7454-01	2.32439
TCGA-66-2771-01	2.33502
TCGA-56-8083-01	1.63553
TCGA-85-7696-01	1.89582
TCGA-77-A5G6-01	1.82413
TCGA-90-A4ED-01	1.71921
TCGA-56-A4BX-01	1.81899
TCGA-NC-A5HG-01	2.09494
TCGA-37-5819-01	1.84819
TCGA-66-2727-01	2.13056
TCGA-77-6843-01	1.86804
TCGA-77-8130-01	1.98769
TCGA-34-5928-01	2.10794
TCGA-22-4594-01	2.20751
TCGA-22-A5C4-01	1.8583
TCGA-33-A5GW-01	2.11325
TCGA-94-8035-01	1.98274
TCGA-94-A5I4-01	1.93789
TCGA-94-7943-01	1.97702
TCGA-85-A53L-01	2.04035
TCGA-63-5128-01	1.88833
TCGA-63-A5MU-01	2.04492
TCGA-37-4129-01	1.66077
TCGA-98-A53C-01	2.30731
TCGA-56-A4ZJ-01	2.19928
TCGA-22-0940-01	2.38397
TCGA-77-8145-01	1.91725
TCGA-O2-A52W-01	1.84206
TCGA-43-6771-11	2.41621
TCGA-63-A5MV-01	2.06609
TCGA-34-5231-01	2.067
TCGA-33-AASD-01	2.0877
TCGA-77-8140-01	1.98016
TCGA-39-5019-01	1.93976
TCGA-22-5478-01	1.88757
TCGA-90-7964-01	2.043
TCGA-68-8250-01	2.05693
TCGA-56-8504-01	2.16226
TCGA-NC-A5HP-01	1.93479
TCGA-33-4566-01	2.23258
TCGA-58-8393-01	2.28912
TCGA-63-A5MS-01	2.07497
TCGA-66-2780-01	2.34309
TCGA-21-1075-01	1.85894
TCGA-56-7823-01	1.89325
TCGA-63-A5MP-01	2.0428
TCGA-85-8072-01	2.08633
TCGA-21-1078-01	2.17112
TCGA-77-A5GH-01	2.29336
TCGA-60-2714-01	1.9852
TCGA-34-2600-01	1.96564
TCGA-33-4533-01	1.74925
TCGA-85-A510-01	1.81033
TCGA-52-7622-01	2.2312
TCGA-77-7337-01	2.18188
TCGA-37-A5EN-01	1.833
TCGA-77-8148-01	1.76454
TCGA-18-5592-01	1.95499
TCGA-77-7335-11	2.32671
TCGA-92-7341-01	1.89395
TCGA-34-A5IX-01	2.07291
TCGA-56-8623-01	2.3795
TCGA-63-A5MI-01	1.74117
TCGA-66-2791-01	2.21142
TCGA-21-1071-01	2.11476
TCGA-60-2711-01	1.90794
TCGA-37-4133-01	2.03995
TCGA-34-8454-01	2.27463
TCGA-77-8146-01	2.14174
TCGA-56-7582-01	2.05962
TCGA-18-3406-01	2.23899
TCGA-56-8309-01	2.43731
TCGA-21-1080-01	2.1196
TCGA-60-2721-01	2.22811
TCGA-60-2716-01	1.98799
TCGA-66-2737-01	2.14894
TCGA-63-7021-01	2.2323
TCGA-85-8352-01	1.84095
TCGA-85-7698-01	2.12422
TCGA-77-8139-01	1.99029
TCGA-34-7107-11	2.35196
TCGA-98-8020-01	2.13762
TCGA-85-8052-01	1.89125
TCGA-43-3920-01	2.00106
TCGA-77-7142-01	1.9432
TCGA-NC-A5HK-01	2.17236
TCGA-43-7658-11	2.25291
TCGA-60-2719-01	1.98227
TCGA-58-8387-01	2.11382
TCGA-43-7658-01	1.8888
TCGA-96-A4JK-01	1.8932
TCGA-43-6143-01	1.97818
TCGA-56-8305-01	2.00787
TCGA-90-6837-11	2.09739
TCGA-66-2769-01	2.26358
TCGA-22-1000-01	2.26111
TCGA-18-3412-01	2.05907
TCGA-66-2759-01	2.25641
TCGA-66-2794-01	2.26363
TCGA-21-1083-01	2.20662
TCGA-60-2695-01	1.90994
TCGA-85-6560-01	1.81549
TCGA-98-8022-01	2.11405
TCGA-43-5668-01	2.12227
TCGA-21-5786-01	1.98728
TCGA-77-8007-11	2.41702
TCGA-34-8456-01	1.8893
TCGA-66-2755-01	2.28575
TCGA-18-4083-01	1.82081
TCGA-56-7222-01	2.10091
TCGA-52-7812-01	2.34826
TCGA-94-8490-01	2.09669
TCGA-51-4081-01	1.8158
TCGA-39-5028-01	2.29459
TCGA-22-5482-01	1.98631
TCGA-60-2725-01	2.39201
TCGA-21-5782-01	2.01032
TCGA-66-2800-01	1.95355
TCGA-18-3421-01	2.1399
TCGA-22-1016-01	2.16733
TCGA-77-8008-01	2.21612
TCGA-66-2767-01	2.37689
TCGA-22-4609-01	2.17488
TCGA-43-3394-01	1.84097
TCGA-43-8115-01	2.12128
TCGA-39-5016-01	2.23949
TCGA-66-2770-01	2.23194
TCGA-85-7697-01	2.13473
TCGA-85-A4CN-01	1.9206
TCGA-56-A5DS-01	2.20578
TCGA-37-3792-01	2.56544
TCGA-O2-A52N-01	2.07391
TCGA-66-2753-01	2.08631
TCGA-66-2754-01	1.76072
TCGA-46-6026-01	1.57821
TCGA-85-7710-01	2.19396
TCGA-85-8664-01	2.02006
TCGA-34-5241-01	2.26537
TCGA-43-A474-01	1.90802
TCGA-96-A4JL-01	2.3291
TCGA-NC-A5HO-01	2.29029
TCGA-77-8133-01	2.15755
TCGA-66-2778-01	2.26203
TCGA-51-4080-11	2.41747
TCGA-22-5473-01	2.08569
TCGA-33-AASI-01	2.13536
TCGA-98-A53B-01	2.09106
TCGA-43-6647-01	2.30669
TCGA-22-4595-01	2.03225
TCGA-56-6546-01	2.07162
TCGA-60-2698-01	2.29821
TCGA-56-5898-01	1.99664
TCGA-77-6842-01	2.37518
TCGA-34-8455-01	2.15911
TCGA-43-A56V-01	2.02548
TCGA-77-8154-01	1.9812
TCGA-77-8138-01	2.22044
TCGA-22-5491-01	2.13813
TCGA-85-A4CL-01	2.0157
TCGA-39-5022-01	2.36547
TCGA-63-A5MR-01	2.38454
TCGA-66-2781-01	2.09923
TCGA-77-7139-01	1.87332
TCGA-37-A5EL-01	2.00669
TCGA-56-8083-11	2.19865
TCGA-39-5036-01	2.07431
TCGA-58-8392-01	1.86016
TCGA-66-2763-01	2.09127
TCGA-66-2785-01	2.36938
TCGA-22-5479-01	2.00539
TCGA-63-A5MT-01	2.29926
TCGA-33-4532-01	1.84061
TCGA-70-6722-01	2.30678
TCGA-60-2707-01	2.34262
TCGA-77-7138-11	2.2462
TCGA-56-7579-11	2.35457
TCGA-85-8071-01	1.95787
TCGA-22-1012-01	1.98924
TCGA-77-7338-11	2.24858
TCGA-58-A46K-01	2.02383
TCGA-94-A5I6-01	1.93655
TCGA-56-A4BY-01	1.96177
TCGA-85-8049-01	2.25024
TCGA-60-2710-01	2.13338
TCGA-18-4086-01	2.17677
TCGA-37-4132-01	2.07147
TCGA-63-7023-01	1.94953
TCGA-21-1070-01	2.41197
TCGA-33-6738-01	1.97695
TCGA-56-A4BW-01	2.13815
TCGA-56-8308-01	2.07958
TCGA-21-1079-01	2.17788
TCGA-66-2742-01	2.17927
TCGA-63-7020-01	2.20856
TCGA-33-AASJ-01	2.01412
TCGA-85-8353-01	2.07829
TCGA-22-5478-11	2.32799
TCGA-18-3410-01	2.41207
TCGA-85-8070-01	1.77333
TCGA-NC-A5HQ-01	2.11052
TCGA-66-2783-01	2.18224
TCGA-18-3407-01	2.26541
TCGA-98-A53A-01	1.89421
TCGA-85-8276-01	1.99538
TCGA-LA-A446-01	2.02443
TCGA-NC-A5HT-01	1.8806
TCGA-58-8386-01	2.01994
TCGA-77-A5GF-01	2.02153
TCGA-56-7731-01	2.22444
TCGA-22-4604-01	2.18197
TCGA-56-8304-01	2.08159
TCGA-63-A5MN-01	2.34596
TCGA-77-7337-11	2.25372
TCGA-96-8169-01	2.24263
TCGA-33-4589-01	2.24405
TCGA-37-4130-01	2.16291
TCGA-NC-A5HJ-01	2.15418
TCGA-56-8623-11	2.31757
TCGA-85-A4PA-01	2.44221
TCGA-34-8454-11	2.27766
TCGA-98-8023-01	2.30236
TCGA-56-8625-01	2.17653
TCGA-43-6770-01	1.94096
TCGA-60-2703-01	1.94242
TCGA-77-A5GB-01	2.16016
TCGA-66-2788-01	2.31805
TCGA-39-5029-01	2.196
TCGA-18-3415-01	2.21049
TCGA-90-A4EE-01	2.33319
TCGA-34-2596-01	2.00549
TCGA-34-5929-01	2.02354
TCGA-96-8170-01	2.19559
TCGA-46-3766-01	2.24132
TCGA-22-5483-01	2.01793
TCGA-56-8629-01	2.02258
TCGA-63-A5MG-01	2.24051
TCGA-77-7140-01	1.7125
TCGA-77-7465-01	2.15718
TCGA-94-8491-01	2.2397
TCGA-43-7657-01	1.68805
TCGA-77-7142-11	2.19765
TCGA-NC-A5HF-01	1.99169
TCGA-63-A5MB-01	1.87525
TCGA-60-2722-01	1.92649
TCGA-66-2768-01	2.42222
TCGA-33-4579-01	2.01441
TCGA-77-7138-01	2.2121
TCGA-68-A59I-01	1.98678
TCGA-22-1017-01	2.19929
TCGA-77-8131-01	2.42179
TCGA-94-A4VJ-01	2.19962
TCGA-56-A5DR-01	2.10774
TCGA-34-5927-01	1.68593
TCGA-60-2697-01	2.30994
TCGA-85-7844-01	1.97861
TCGA-68-7756-01	2.14757
TCGA-85-A4JC-01	2.23902
TCGA-77-8007-01	2.12242
TCGA-98-8021-01	1.99279
TCGA-58-A46J-01	1.95089
TCGA-56-7222-11	2.23958
TCGA-22-5472-01	2.17541
TCGA-NC-A5HN-01	1.99133
TCGA-34-5239-01	2.28472
TCGA-92-8064-01	2.28684
TCGA-85-A50Z-01	2.01152
TCGA-77-7463-01	1.97099
TCGA-O2-A52V-01	2.19658
TCGA-21-5784-01	2.23236
TCGA-85-6175-01	2.12639
TCGA-39-5039-01	2.28327
TCGA-39-5024-01	2.24911
TCGA-22-1005-01	2.35719
TCGA-66-2757-01	1.95627
TCGA-77-8008-11	2.28822
TCGA-52-7810-01	1.95812
TCGA-85-A4QR-01	1.7887
TCGA-LA-A7SW-01	2.0243
TCGA-90-7767-01	2.08354
TCGA-90-6837-01	2.11519
TCGA-77-8150-01	1.99565
TCGA-33-4582-01	1.87298
TCGA-51-6867-01	1.97135
TCGA-33-A4WN-01	2.04106
TCGA-18-5595-01	1.88357
TCGA-56-8082-11	2.48431
TCGA-85-7710-11	2.50471
TCGA-18-3419-01	2.17792
TCGA-NK-A5CT-01	2.14134
TCGA-56-7580-11	2.28178
TCGA-85-8288-01	2.17004
TCGA-18-3416-01	2.27587
TCGA-79-5596-01	1.92909
TCGA-18-4721-01	2.11351
TCGA-66-2789-01	2.0231
TCGA-85-8351-01	2.11179
TCGA-43-5670-01	2.17959
TCGA-60-2709-01	2.09544
TCGA-43-6647-11	2.29571
TCGA-98-A53D-01	2.22988
TCGA-85-8666-01	2.17435
TCGA-56-8503-01	2.25018
TCGA-NK-A5CX-01	2.16964
TCGA-56-7221-01	1.88137
TCGA-21-1082-01	1.96869
TCGA-63-A5ML-01	1.97748
TCGA-22-5477-01	1.98353
TCGA-98-A538-01	2.01245
TCGA-46-3765-01	2.062
TCGA-22-4591-01	1.90233
TCGA-98-A53H-01	2.23045
TCGA-XC-AA0X-01	2.11464
TCGA-98-A53J-01	2.04257
TCGA-85-8277-01	2.02604
TCGA-39-5040-11	2.39444
TCGA-66-2787-01	1.97233
TCGA-77-8143-01	1.80601
TCGA-56-7823-11	2.29794
TCGA-85-6561-01	2.15711
TCGA-77-6845-01	1.89464
TCGA-56-7730-01	1.82911
TCGA-21-1076-01	2.2632
TCGA-39-5035-01	2.24484
TCGA-56-7579-01	2.05699
TCGA-58-A46M-01	2.00312
TCGA-77-7338-01	2.13786
TCGA-85-8582-01	2.09614
TCGA-63-A5MH-01	1.90405
TCGA-56-8201-11	2.32535
TCGA-34-5234-01	2.40562
TCGA-63-A5MJ-01	2.11063
TCGA-92-7340-11	2.3828
TCGA-56-1622-01	1.98354
TCGA-22-4605-01	2.10218
TCGA-22-5471-11	2.23201
TCGA-56-8624-01	2.06783
TCGA-94-7033-01	2.10548
TCGA-43-6773-11	2.42542
TCGA-85-A513-01	2.30661
TCGA-60-2704-01	2.186
TCGA-33-4538-01	2.12642
TCGA-56-7822-01	2.1866
TCGA-56-A62T-01	1.97832
TCGA-85-A4JB-01	1.94164
TCGA-56-A49D-01	2.05967
TCGA-58-8386-11	2.41053
TCGA-43-2576-01	2.0608
TCGA-39-5034-01	1.98775
TCGA-18-3411-01	2.05107
TCGA-77-A5FZ-01	2.36643
TCGA-22-4593-11	2.39123
TCGA-43-5670-11	2.26952
TCGA-39-5030-01	2.40624
TCGA-58-8390-01	2.01817
TCGA-34-5232-01	2.35687
TCGA-43-8118-01	2.12015
TCGA-66-2793-01	1.73468
TCGA-68-7757-01	2.06734
TCGA-66-2734-01	2.22241
TCGA-60-2696-01	2.29958
TCGA-60-2723-01	2.01398
TCGA-92-8065-01	2.21705
TCGA-60-2726-01	2.02387
TCGA-52-7811-01	2.1833
TCGA-21-1072-01	2.03428
TCGA-33-6737-11	2.33822
TCGA-77-8136-01	2.2712
TCGA-22-5474-01	2.36628
TCGA-22-5483-11	2.24476
TCGA-33-4587-01	1.70498
TCGA-39-5027-01	1.72274
TCGA-22-5492-01	2.29464
TCGA-18-3409-01	1.93544
TCGA-22-5485-01	1.96648
TCGA-66-2756-01	2.00895
TCGA-33-4583-01	2.33037
TCGA-43-7657-11	2.26345
TCGA-66-2773-01	2.20716
TCGA-MF-A522-01	1.94205
TCGA-56-8628-01	2.09179
TCGA-21-A5DI-01	2.16807
TCGA-18-3414-01	2.19925
TCGA-77-7141-01	1.90034
TCGA-90-7766-01	2.19492
TCGA-46-3768-01	1.97696
TCGA-O2-A52Q-01	2.2597
TCGA-22-5489-01	2.31137
TCGA-70-6723-01	2.02152
TCGA-NC-A5HD-01	1.86796
TCGA-NC-A5HM-01	2.18413
TCGA-60-2720-01	2.17257
TCGA-46-6025-01	1.94561
TCGA-56-5897-01	2.23934
TCGA-52-7809-01	1.81186
TCGA-85-8048-01	2.26967
TCGA-43-8116-01	2.25214
TCGA-68-7755-01	1.93787
TCGA-43-2581-01	2.29192
TCGA-NC-A5HH-01	1.61826
TCGA-22-5472-11	2.28472
TCGA-22-5481-01	2.02651
TCGA-22-4607-01	2.18048
TCGA-22-5481-11	2.30906
TCGA-21-5787-01	2.13902
TCGA-85-8350-01	1.98974
TCGA-33-4587-11	2.31009
TCGA-51-4079-11	2.29051
TCGA-66-2782-01	2.34936
TCGA-66-2765-01	2.32378
TCGA-NC-A5HL-01	2.02401
TCGA-43-6771-01	2.40731
TCGA-77-A5G7-01	1.98275
TCGA-6A-AB49-01	2.04673
TCGA-33-AASB-01	1.93544
TCGA-90-7767-11	2.23472
TCGA-85-A511-01	2.26136
TCGA-NK-A7XE-01	2.15968
TCGA-56-6545-01	2.28693
TCGA-34-2608-01	2.25733
TCGA-46-3769-01	2.30968
TCGA-37-3783-01	2.41603
TCGA-56-8307-01	2.33709
TCGA-NK-A5CR-01	1.75938
TCGA-63-A5MM-01	2.44758
TCGA-22-0944-01	2.22225
TCGA-77-6844-01	2.16047
TCGA-66-2786-01	2.23805
TCGA-56-8082-01	2.07942
TCGA-98-A539-01	2.05846
TCGA-O2-A52S-01	1.91338
TCGA-33-4586-01	2.04823
TCGA-21-1077-01	2.04123
TCGA-60-2713-01	1.99197
TCGA-L3-A524-01	1.8318
TCGA-39-5021-01	2.01489
TCGA-85-A5B5-01	1.79086
TCGA-58-A46L-01	2.0637
TCGA-77-8144-01	2.17948
TCGA-J1-A4AH-01	1.84283
TCGA-56-7580-01	2.01096
TCGA-63-A5MY-01	1.85616
TCGA-33-AASL-01	2.05703
TCGA-85-A512-01	2.04199
TCGA-85-8354-01	1.83834
TCGA-O2-A5IB-01	1.70674
TCGA-77-7335-01	2.20298
TCGA-56-7731-11	2.4084
