# Supplementary material for: The necroptosis signature and molecular mechanism of lung squamous cell carcinoma
Source: Aging (Albany NY). 2023 Nov 15;15(22):12907–26. doi: 10.18632/aging.205210 (PMC10713426; doi:10.18632/aging.205210)
Supplement: Supplementary Table 2 [file aging-15-205210-s003.xlsx]

## Sheet: Sheet1
Supplementary Table 2. ssGSEA score.
	TCGA.18.3406.01	TCGA.18.3407.01	TCGA.18.3408.01	TCGA.18.3409.01	TCGA.18.3410.01	TCGA.18.3411.01	TCGA.18.3412.01	TCGA.18.3414.01	TCGA.18.3415.01	TCGA.18.3416.01	TCGA.18.3417.01	TCGA.18.3419.01	TCGA.18.3421.01	TCGA.18.4083.01	TCGA.18.4086.01	TCGA.18.4721.01	TCGA.18.5592.01	TCGA.18.5595.01	TCGA.21.1070.01	TCGA.21.1071.01	TCGA.21.1072.01	TCGA.21.1075.01	TCGA.21.1076.01	TCGA.21.1077.01	TCGA.21.1078.01	TCGA.21.1079.01	TCGA.21.1080.01	TCGA.21.1081.01	TCGA.21.1082.01	TCGA.21.1083.01	TCGA.21.5782.01	TCGA.21.5783.01	TCGA.21.5784.01	TCGA.21.5786.01	TCGA.21.5787.01	TCGA.21.A5DI.01	TCGA.22.0940.01	TCGA.22.0944.01	TCGA.22.1000.01	TCGA.22.1002.01	TCGA.22.1005.01	TCGA.22.1011.01	TCGA.22.1012.01	TCGA.22.1016.01	TCGA.22.1017.01	TCGA.22.4591.01	TCGA.22.4593.01	TCGA.22.4594.01	TCGA.22.4595.01
KEGG_N_GLYCAN_BIOSYNTHESIS	0.291335	0.28256	0.307154	0.275486	0.245844	0.296432	0.291413	0.280089	0.303321	0.303921	0.310742	0.297577	0.280028	0.270315	0.285864	0.312285	0.259405	0.24883	0.278741	0.296431	0.296684	0.285854	0.268488	0.303206	0.283495	0.290124	0.296238	0.260459	0.276495	0.269188	0.284303	0.255327	0.279448	0.286716	0.288714	0.260457	0.278425	0.257016	0.274521	0.271012	0.301751	0.303066	0.24783	0.27695	0.290659	0.307611	0.286766	0.324711	0.295265
KEGG_OTHER_GLYCAN_DEGRADATION	0.252343	0.250602	0.286812	0.284011	0.259194	0.271158	0.267237	0.25681	0.280091	0.273728	0.301953	0.316183	0.27892	0.250666	0.26249	0.29843	0.237978	0.199646	0.251837	0.260883	0.224821	0.269821	0.313106	0.261098	0.298377	0.292015	0.254723	0.244163	0.278662	0.248589	0.245545	0.221258	0.281769	0.255459	0.263179	0.262105	0.273839	0.215042	0.31357	0.268762	0.317141	0.264592	0.228896	0.309943	0.277826	0.287317	0.247449	0.299347	0.266676
KEGG_O_GLYCAN_BIOSYNTHESIS	0.156163	0.135943	0.163351	0.102248	0.0533945	0.168048	0.165666	0.157819	0.166276	0.0655676	0.111435	0.197217	0.119139	0.0973784	0.0980171	0.133949	0.0796714	0.0645707	0.160917	0.147069	0.142485	0.152742	0.113254	0.142474	0.109631	0.118919	0.139664	0.118281	0.0759703	0.080287	0.107725	0.117496	0.144883	0.0916319	0.135536	0.125384	0.145075	0.128228	0.162907	0.108765	0.124141	0.166706	0.149003	0.106479	0.220062	0.1746	0.157504	0.142592	0.10861
KEGG_GLYCOSAMINOGLYCAN_DEGRADATION	0.127993	0.173606	0.168214	0.172259	0.137494	0.195674	0.182591	0.160061	0.203635	0.17293	0.217914	0.176234	0.150805	0.148123	0.173198	0.175364	0.169212	0.164604	0.156828	0.188459	0.165951	0.166556	0.217588	0.180253	0.170076	0.181621	0.131833	0.161207	0.173626	0.140156	0.162208	0.178766	0.200441	0.16416	0.160579	0.155657	0.185722	0.15308	0.212781	0.178491	0.196367	0.15827	0.164761	0.203361	0.172981	0.192467	0.184944	0.183072	0.182606
KEGG_GLYCOSAMINOGLYCAN_BIOSYNTHESIS_KERATAN_SULFATE	0.199018	0.23453	0.255894	0.222514	0.177316	0.311728	0.183855	0.252517	0.289404	0.210979	0.24804	0.204281	0.258969	0.198803	0.273146	0.239247	0.218218	0.168083	0.20073	0.243466	0.226987	0.240941	0.251847	0.291062	0.189352	0.184148	0.171402	0.213296	0.198897	0.188178	0.242542	0.208395	0.266503	0.195063	0.211474	0.253001	0.214659	0.22014	0.244126	0.206541	0.252088	0.262827	0.247443	0.181849	0.251771	0.313585	0.256452	0.215568	0.198256
KEGG_GLYCEROLIPID_METABOLISM	0.0794407	0.112026	0.0919074	0.114411	0.134691	0.102424	0.12802	0.0909073	0.113839	0.0883109	0.093152	0.110089	0.0811138	0.0952043	0.104271	0.109835	0.118437	0.137828	0.101383	0.115618	0.0914253	0.0931384	0.1183	0.117167	0.113958	0.0888299	0.0662758	0.111167	0.0822383	0.135174	0.10722	0.100882	0.121187	0.0903184	0.103537	0.0861701	0.118935	0.108285	0.127303	0.119818	0.0985114	0.0904702	0.116465	0.121965	0.123523	0.117509	0.0869667	0.124188	0.12451
KEGG_GLYCOSYLPHOSPHATIDYLINOSITOL_GPI_ANCHOR_BIOSYNTHESIS	0.236111	0.211596	0.251451	0.188961	0.161738	0.232683	0.235005	0.218347	0.233519	0.242652	0.246035	0.244596	0.230385	0.223475	0.236705	0.224854	0.213792	0.195625	0.17409	0.22404	0.246306	0.260624	0.175748	0.20442	0.246468	0.183082	0.225505	0.178618	0.199749	0.207753	0.187453	0.157211	0.208679	0.184206	0.19541	0.209401	0.187312	0.205676	0.15278	0.20643	0.155716	0.20403	0.183305	0.177327	0.157227	0.237393	0.207613	0.201006	0.214286
KEGG_GLYCEROPHOSPHOLIPID_METABOLISM	0.104185	0.136915	0.140715	0.11716	0.114885	0.154257	0.169709	0.140114	0.137786	0.142428	0.145139	0.137208	0.139646	0.139732	0.151201	0.124288	0.157126	0.144721	0.135743	0.125741	0.140249	0.1334	0.129513	0.154375	0.160341	0.116898	0.138773	0.142446	0.121759	0.125542	0.131271	0.128126	0.149394	0.134387	0.128637	0.130535	0.133422	0.138871	0.13216	0.14212	0.125125	0.124421	0.150656	0.14461	0.153076	0.160878	0.137592	0.138844	0.148714
KEGG_ETHER_LIPID_METABOLISM	0.0608619	0.0783117	0.0840283	0.0627438	0.0667592	0.0880194	0.0801475	0.0597923	0.0503545	0.0581319	0.0822938	0.0674082	0.0853477	0.0770748	0.0896954	0.0716022	0.0495988	0.0418091	0.0715331	0.0479078	0.0529461	0.0410981	0.122201	0.0663509	0.0856579	0.0415347	0.0910924	0.0321067	0.0653267	0.0596144	0.0452252	0.0320602	0.0806031	0.0465316	0.0539814	0.0379802	0.0731197	0.0644231	0.0763304	0.0882646	0.0731443	0.0506957	0.0810885	0.108913	0.0979511	0.0576677	0.0868318	0.0771807	0.0579753
KEGG_ARACHIDONIC_ACID_METABOLISM	0.00831266	0.0573051	0.021928	-0.0258077	0.0214334	0.0328635	0.0448429	-0.00152092	0.0289858	-0.0289009	0.0134511	-0.0178714	0.0374406	-0.0197741	0.0469887	-0.00127322	-0.0200597	-0.00212408	0.0129748	-0.00909112	-0.0316361	0.00323837	0.0552053	0.0131976	0.0380523	-0.0797766	-0.0612082	0.0161122	-0.0231201	0.0125156	-0.000340233	-0.0803926	0.0638089	-0.0673285	-0.0176624	-0.0383014	0.0323504	0.0311637	0.0215765	0.0316902	0.0367611	0.00594584	0.0247505	0.00493883	-0.0185721	0.0114163	0.0131397	0.0430031	-0.0196029
KEGG_LINOLEIC_ACID_METABOLISM	-0.152001	-0.102598	-0.138817	-0.237831	-0.152779	-0.145142	-0.100174	-0.130058	-0.171093	-0.199581	-0.243764	-0.161188	-0.0792537	-0.205936	-0.141108	-0.214972	-0.203417	-0.151414	-0.149878	-0.211462	-0.21024	-0.178355	-0.12067	-0.187762	-0.141725	-0.272973	-0.244229	-0.163364	-0.141467	-0.221532	-0.1787	-0.257593	-0.102813	-0.250062	-0.196766	-0.203811	-0.178047	-0.170678	-0.18523	-0.13247	-0.163149	-0.177539	-0.164472	-0.164183	-0.161607	-0.128746	-0.15236	-0.150248	-0.194518
KEGG_ALPHA_LINOLENIC_ACID_METABOLISM	-0.0558688	-0.00713274	-0.0517796	-0.0738837	-0.00442861	-0.0123821	-0.0264323	-0.0485554	-0.0490071	-0.0529569	-0.0502295	-0.0786385	0.00744566	-0.0412819	0.000588156	-0.0782827	-0.0666182	-0.0374946	-0.0496232	-0.068174	-0.0660004	-0.0532107	-0.0104455	-0.0524475	-0.0147407	-0.105339	-0.111172	-0.0571941	-0.0293426	-0.057416	-0.0678389	-0.0766831	-0.0247993	-0.0885499	-0.0462465	-0.0717861	-0.0482758	-0.0233521	-0.0510954	0.0103866	-0.019855	-0.0507074	-0.0248002	0.0154256	0.026181	-0.0210133	-0.00398545	0.00231027	-0.0618791
KEGG_SPHINGOLIPID_METABOLISM	0.147912	0.153743	0.190866	0.160267	0.131554	0.167441	0.168382	0.151109	0.173695	0.149049	0.154719	0.18349	0.138749	0.11194	0.153752	0.172075	0.143671	0.114861	0.149542	0.153743	0.143276	0.134986	0.169713	0.154846	0.135123	0.177331	0.145147	0.12285	0.118048	0.144005	0.111589	0.111552	0.141826	0.135956	0.153758	0.105595	0.160986	0.163355	0.163535	0.14899	0.147857	0.14064	0.161512	0.155966	0.198029	0.136658	0.14962	0.179767	0.158972
KEGG_GLYCOSPHINGOLIPID_BIOSYNTHESIS_LACTO_AND_NEOLACTO_SERIES	0.0317167	0.103366	0.0746518	0.000709069	0.0349226	0.0785672	0.0961452	0.0980929	0.110185	0.0394814	0.0770938	0.104051	0.0775248	0.0217885	0.0723608	0.0403779	0.0411975	0.03686	0.0936936	0.0432439	0.0491071	0.0776212	0.0707356	0.0867653	0.0636323	0.0155496	0.0303195	0.0631017	0.0881939	0.0167077	0.0773724	0.0173902	0.101043	0.0146089	0.0715226	0.063166	0.0330328	0.0985664	0.0702738	0.0115166	0.0549682	0.0902654	0.0745025	0.0178846	0.0373569	0.0605271	-0.00816144	0.0756418	0.0488568
KEGG_GLYCOSPHINGOLIPID_BIOSYNTHESIS_GLOBO_SERIES	0.137891	0.195734	0.175696	0.1196	0.134039	0.243691	0.212547	0.190537	0.199679	0.148561	0.196714	0.214721	0.134447	0.101332	0.192372	0.160734	0.157167	0.0973385	0.152598	0.17109	0.138639	0.177985	0.21921	0.19919	0.128081	0.120429	0.122806	0.0936395	0.137753	0.0518411	0.178756	0.139344	0.197117	0.115321	0.118196	0.152244	0.186192	0.13719	0.185718	0.111421	0.125343	0.168219	0.184489	0.148199	0.155085	0.173576	0.148832	0.130815	0.104005
KEGG_GLYCOSPHINGOLIPID_BIOSYNTHESIS_GANGLIO_SERIES	0.179618	0.159946	0.181783	0.183359	0.155239	0.200548	0.158267	0.150993	0.189734	0.147676	0.20229	0.153933	0.15516	0.139895	0.177966	0.177328	0.131112	0.112267	0.128503	0.158493	0.165516	0.146828	0.17789	0.15869	0.157829	0.157669	0.10291	0.0958381	0.119914	0.101063	0.183452	0.169519	0.207146	0.120079	0.13627	0.131403	0.175178	0.112797	0.196608	0.175836	0.186841	0.165567	0.14233	0.170235	0.195014	0.152672	0.162691	0.179435	0.137075
KEGG_RIBOFLAVIN_METABOLISM	0.201024	0.187429	0.189232	0.214599	0.208958	0.241807	0.168192	0.179679	0.230806	0.196766	0.18746	0.191634	0.21389	0.138887	0.179184	0.207967	0.167113	0.128745	0.184482	0.195728	0.164069	0.156399	0.197797	0.181902	0.175407	0.177439	0.17157	0.113809	0.159202	0.16292	0.131924	0.153459	0.18524	0.155465	0.207966	0.154433	0.232826	0.165695	0.198354	0.155471	0.179889	0.167801	0.199314	0.178737	0.177553	0.167287	0.13063	0.284097	0.202123
KEGG_NICOTINATE_AND_NICOTINAMIDE_METABOLISM	0.123189	0.118238	0.0863475	0.107754	0.0524885	0.115	0.120683	0.0781079	0.125921	0.102317	0.0910806	0.0718323	0.13046	0.0851119	0.11707	0.0818211	0.0746362	0.061121	0.104866	0.0907332	0.0594372	0.0351539	0.109126	0.077375	0.0494235	0.102312	0.0889125	0.11178	0.0740435	0.0740353	0.0823161	0.0782695	0.0843849	0.0749572	0.123539	0.0824847	0.096735	0.100363	0.114953	0.0879474	0.139934	0.0714212	0.0758308	0.0899128	0.137638	0.0940025	0.133967	0.155522	0.0764752
KEGG_PANTOTHENATE_AND_COA_BIOSYNTHESIS	0.112886	0.0773322	0.0639594	0.05956	0.128507	0.0883736	0.0642082	0.113254	0.0700035	0.0647844	0.0638864	0.161624	0.159692	0.0265655	0.0599001	0.0675371	-0.0218153	0.0665657	0.0917532	0.0728426	0.022605	0.0792995	0.101623	0.0484627	0.0384702	0.0342166	0.0869746	0.0575268	0.0517519	0.0866991	0.0632351	0.0650054	0.0702068	0.0879297	0.0951513	0.0622385	0.0632789	0.010386	0.0771784	0.0820601	0.0755309	0.100452	0.0900621	0.0739827	0.0768346	0.10788	0.079886	0.0667843	0.0859525
KEGG_AMINOACYL_TRNA_BIOSYNTHESIS	0.1729	0.170641	0.149328	0.163752	0.182941	0.221013	0.191214	0.156099	0.190172	0.175457	0.191935	0.208984	0.214977	0.215415	0.179932	0.202261	0.20873	0.205187	0.151308	0.188063	0.216828	0.217689	0.139708	0.193593	0.225566	0.155831	0.253819	0.208402	0.181045	0.233187	0.187104	0.154421	0.150734	0.212786	0.220022	0.168578	0.168836	0.185939	0.133057	0.172754	0.134927	0.167152	0.204085	0.162751	0.169364	0.182354	0.193545	0.193212	0.187875
KEGG_BASAL_TRANSCRIPTION_FACTORS	0.203386	0.163824	0.196179	0.170384	0.187819	0.208557	0.185915	0.174956	0.18332	0.184058	0.168194	0.188133	0.188471	0.185066	0.181576	0.173914	0.185298	0.189838	0.162794	0.195715	0.194764	0.219906	0.143707	0.178984	0.181497	0.179259	0.206469	0.187503	0.165772	0.169157	0.155578	0.165043	0.143692	0.17553	0.181911	0.17569	0.172977	0.188909	0.124711	0.14951	0.127744	0.159085	0.212585	0.130047	0.158469	0.200151	0.164631	0.188095	0.137363
KEGG_NON_HOMOLOGOUS_END_JOINING	0.237558	0.217433	0.216245	0.206324	0.229309	0.206591	0.224563	0.200912	0.20598	0.229526	0.18147	0.235887	0.225606	0.246618	0.200861	0.221661	0.232696	0.253177	0.241123	0.238486	0.221392	0.226954	0.194545	0.216847	0.247605	0.260202	0.243894	0.224565	0.233639	0.26238	0.213499	0.250854	0.163918	0.220935	0.239914	0.202885	0.218908	0.246556	0.177818	0.202785	0.19906	0.192028	0.233369	0.214084	0.248951	0.209605	0.259678	0.246606	0.225411
KEGG_SNARE_INTERACTIONS_IN_VESICULAR_TRANSPORT	0.276984	0.221173	0.26546	0.239331	0.220519	0.224781	0.223319	0.233852	0.241096	0.226091	0.238402	0.22203	0.260277	0.199784	0.222198	0.23338	0.192529	0.181528	0.229743	0.225691	0.209788	0.234795	0.235061	0.21406	0.234261	0.236718	0.231182	0.20927	0.219217	0.216856	0.190457	0.184553	0.226922	0.215422	0.234469	0.225801	0.238978	0.214676	0.236745	0.229212	0.25743	0.220592	0.223858	0.233207	0.246163	0.216073	0.203919	0.259775	0.215659
KEGG_LYSOSOME	0.319971	0.33518	0.336547	0.35026	0.31958	0.33859	0.332932	0.319861	0.334511	0.324867	0.360563	0.338573	0.3201	0.308759	0.325183	0.350316	0.29292	0.289834	0.328882	0.333783	0.291331	0.296135	0.377607	0.344687	0.329419	0.335175	0.321633	0.304826	0.333329	0.319871	0.32294	0.289126	0.348564	0.318561	0.339595	0.302555	0.340416	0.305795	0.377092	0.348036	0.362964	0.326007	0.334713	0.3646	0.344856	0.332322	0.315203	0.358554	0.355466
KEGG_CARDIAC_MUSCLE_CONTRACTION	0.139789	0.117635	0.115513	0.113439	0.10888	0.110607	0.121035	0.11484	0.120052	0.104788	0.136096	0.119195	0.139173	0.109179	0.116627	0.111601	0.0912824	0.11056	0.110556	0.102877	0.0963246	0.120646	0.127274	0.120638	0.111011	0.0973752	0.107033	0.0982031	0.109825	0.108394	0.12106	0.106268	0.134877	0.117129	0.116892	0.10676	0.118209	0.118614	0.124563	0.108435	0.124904	0.107754	0.140425	0.114757	0.118748	0.105139	0.11612	0.116413	0.100375
KEGG_RENIN_ANGIOTENSIN_SYSTEM	-0.0364669	0.0358822	0.014654	0.0272166	-0.0441335	-0.00235167	-0.00787943	-0.00425691	0.002053	-0.0230209	-0.00552724	-0.0929611	-0.0299898	-0.00823321	-0.0273184	1.02469e-05	-0.0412492	-0.0217764	-0.0296143	0.0296884	-0.0261254	-0.0422201	0.0194652	-0.0134062	-0.0702914	0.0288724	-0.0600323	-0.0147054	-0.0618373	-0.0281759	-0.026367	-0.0358859	0.00591892	-0.0506827	0.0024579	-0.078891	0.0220581	-0.0564577	0.052639	0.0472948	-0.0352894	-0.0327933	-0.00660532	0.102308	0.028172	-0.0336461	0.00999934	0.0042997	-0.0143541
KEGG_CIRCADIAN_RHYTHM_MAMMAL	0.259355	0.270774	0.240567	0.292677	0.256788	0.200286	0.21676	0.29535	0.17196	0.189948	0.26245	0.245074	0.183968	0.217983	0.254681	0.223328	0.245061	0.32801	0.26138	0.196613	0.189784	0.25837	0.291365	0.248138	0.295324	0.216147	0.220054	0.26966	0.302854	0.203226	0.256898	0.290021	0.268129	0.235121	0.273878	0.32198	0.224116	0.281414	0.304077	0.266872	0.287929	0.309354	0.258285	0.268349	0.232854	0.324645	0.302821	0.200051	0.269271
KEGG_TASTE_TRANSDUCTION	-0.169966	-0.171598	-0.147063	-0.164037	-0.173704	-0.168128	-0.15259	-0.169657	-0.165675	-0.154211	-0.173428	-0.164271	-0.17635	-0.153519	-0.143967	-0.151191	-0.147324	-0.138568	-0.158031	-0.140684	-0.150984	-0.149549	-0.141926	-0.162804	-0.156097	-0.199284	-0.182016	-0.16118	-0.12342	-0.107056	-0.144336	-0.1709	-0.14643	-0.157237	-0.167852	-0.171815	-0.183627	-0.16961	-0.145408	-0.144679	-0.140332	-0.11654	-0.175049	-0.140529	-0.148318	-0.157549	-0.145369	-0.149606	-0.152809
KEGG_PROXIMAL_TUBULE_BICARBONATE_RECLAMATION	0.124802	0.113013	0.135255	0.100102	0.102723	0.116201	0.141709	0.109227	0.0900943	0.0987218	0.133608	0.114735	0.18138	0.122264	0.126737	0.133892	0.130108	0.13083	0.126447	0.0782372	0.0957262	0.120408	0.135144	0.105809	0.0976556	0.095687	0.10488	0.102757	0.0854619	0.0855706	0.108764	0.100624	0.122569	0.0791483	0.116788	0.0735406	0.133902	0.136997	0.124197	0.136618	0.113428	0.108384	0.13028	0.107746	0.116701	0.139718	0.0968168	0.113508	0.125906
KEGG_PATHOGENIC_ESCHERICHIA_COLI_INFECTION	0.344212	0.345408	0.325422	0.362615	0.363046	0.352499	0.335048	0.350824	0.353285	0.340311	0.341523	0.348882	0.333768	0.313093	0.358556	0.351231	0.341477	0.323867	0.353799	0.356844	0.339785	0.322445	0.364058	0.346495	0.318166	0.356708	0.323445	0.341691	0.33154	0.353809	0.345537	0.353986	0.356458	0.347008	0.341235	0.347725	0.35801	0.344446	0.379602	0.355757	0.37517	0.340011	0.355082	0.371192	0.37843	0.334753	0.359606	0.378625	0.366933
KEGG_SYSTEMIC_LUPUS_ERYTHEMATOSUS	0.257208	0.184546	0.218352	0.244923	0.227303	0.203054	0.136828	0.145906	0.188659	0.222776	0.190729	0.185099	0.209047	0.147196	0.187597	0.230817	0.106293	0.0754378	0.216413	0.159727	0.0911909	0.0525339	0.259048	0.151174	0.0334341	0.123299	0.146992	0.0723111	0.185115	0.188346	0.153352	0.086886	0.227553	0.125905	0.232852	0.0266324	0.245472	0.0804112	0.266359	0.213443	0.270828	0.210694	0.146641	0.238885	0.222179	0.138017	0.098619	0.230821	0.222002
KEGG_PRIMARY_IMMUNODEFICIENCY	0.0976214	0.051797	0.042979	-0.00179819	0.158289	0.0292395	0.0252157	0.0399668	0.0800809	0.181584	0.059055	0.0968637	0.0611814	0.0647607	0.0658986	0.123946	0.0149961	-0.0371224	0.151862	0.0221451	-0.0323101	-0.0664538	0.131672	0.0554553	-0.0448208	-0.00223217	0.0179056	-0.050903	0.0731028	0.0858746	0.0435408	-0.0272426	0.0727355	0.0298301	0.150159	0.00142763	0.15374	-0.00651518	0.129603	0.0548308	0.224183	0.136708	0.0685928	0.0336339	0.0622073	-0.00352612	0.00782459	0.126358	0.0491339
KEGG_HYPERTROPHIC_CARDIOMYOPATHY_HCM	0.0888217	0.0941957	0.0934523	0.143253	0.0748556	0.0761813	0.0574258	0.0771439	0.0867776	0.048966	0.126656	0.0471465	0.0687154	0.103625	0.0915273	0.0919657	0.0688347	0.0763151	0.0916123	0.0854701	0.0734654	0.0641332	0.125643	0.0986755	0.0564476	0.104048	0.0565234	0.074663	0.0637888	0.0721776	0.0814745	0.127524	0.0984275	0.0807488	0.0572092	0.0845786	0.101612	0.0815053	0.138022	0.141423	0.110392	0.0916841	0.0894991	0.148454	0.0961034	0.0646989	0.127807	0.0751055	0.0932642
KEGG_ARRHYTHMOGENIC_RIGHT_VENTRICULAR_CARDIOMYOPATHY_ARVC	0.117032	0.146323	0.143555	0.200941	0.130479	0.118036	0.107548	0.142209	0.131445	0.111475	0.178612	0.0936189	0.110435	0.142473	0.140088	0.143671	0.116764	0.137037	0.13973	0.143332	0.138543	0.125412	0.171918	0.151529	0.101505	0.160286	0.111277	0.123839	0.116243	0.127235	0.14368	0.193392	0.134712	0.144889	0.0989775	0.148818	0.15217	0.133867	0.183379	0.179223	0.148295	0.144313	0.14164	0.184425	0.143776	0.131757	0.188146	0.0949858	0.151528
KEGG_DILATED_CARDIOMYOPATHY	0.0687423	0.0922802	0.0863716	0.137113	0.063979	0.0591719	0.0452964	0.0642215	0.0752382	0.053029	0.116267	0.0362919	0.0507764	0.0973619	0.0870155	0.0930617	0.0595826	0.0702011	0.0921818	0.0819506	0.0765431	0.065587	0.123455	0.0939082	0.043902	0.0911547	0.0514696	0.0792038	0.0701483	0.0701449	0.0867002	0.12516	0.092364	0.0842204	0.0555644	0.0775559	0.0928381	0.0721142	0.13065	0.133889	0.103051	0.0933362	0.081382	0.136995	0.0878177	0.0566913	0.127545	0.0691009	0.0947914
KEGG_GLYCOLYSIS_GLUCONEOGENESIS	0.214375	0.24682	0.224498	0.229513	0.222591	0.223139	0.257974	0.21191	0.233991	0.211494	0.229132	0.231556	0.243649	0.217674	0.234166	0.234519	0.234974	0.246317	0.222573	0.223728	0.209398	0.222383	0.239646	0.239472	0.201414	0.17194	0.19059	0.179528	0.201776	0.228887	0.217078	0.188286	0.251247	0.202519	0.187745	0.213892	0.224293	0.227263	0.222285	0.237249	0.218076	0.22266	0.229465	0.213912	0.235397	0.266055	0.21035	0.207251	0.197442
KEGG_CITRATE_CYCLE_TCA_CYCLE	0.375723	0.395768	0.363145	0.36812	0.356015	0.390744	0.397414	0.382808	0.405039	0.383979	0.394747	0.40139	0.410013	0.358517	0.391406	0.390182	0.416945	0.394794	0.369304	0.377038	0.379312	0.394144	0.366074	0.381478	0.396119	0.353216	0.365198	0.357572	0.349787	0.382074	0.350771	0.340578	0.367412	0.38119	0.391765	0.345439	0.383334	0.386347	0.359198	0.350218	0.35287	0.361447	0.371005	0.338073	0.361508	0.394365	0.374838	0.388401	0.369878
KEGG_PENTOSE_PHOSPHATE_PATHWAY	0.301488	0.302944	0.283246	0.29399	0.286433	0.306648	0.331074	0.259543	0.31345	0.303308	0.324621	0.291709	0.314358	0.285798	0.300028	0.320738	0.305799	0.313632	0.27361	0.290209	0.304801	0.303918	0.273362	0.328423	0.299272	0.264996	0.301653	0.270359	0.258539	0.303475	0.324009	0.290282	0.287421	0.295134	0.269241	0.28194	0.283167	0.319091	0.282542	0.27865	0.265298	0.282141	0.314684	0.264392	0.327773	0.324592	0.287535	0.283376	0.289824
KEGG_PENTOSE_AND_GLUCURONATE_INTERCONVERSIONS	-0.0134239	0.0302816	0.0568334	-0.0354343	-0.0880577	0.0407503	0.092715	-0.0217244	0.0613394	0.0452548	0.00875573	-0.0105391	-0.0232033	-0.0492702	-0.00367861	0.0282533	0.0214848	0.0251403	-0.0973047	-0.00431765	0.033169	0.0535661	-0.00612537	0.0296072	-0.0073521	-0.131595	-0.0218476	-0.0419924	-0.0744941	-0.0404059	-0.0365503	-0.139009	-0.0243505	-0.0978554	-0.0910805	-0.0564642	-0.0358459	0.0127551	-0.100579	0.0338002	-0.10024	-0.035519	-0.120094	-0.107379	-0.118219	0.14646	-0.0774287	-0.0157096	-0.105633
KEGG_FRUCTOSE_AND_MANNOSE_METABOLISM	0.257617	0.276111	0.242354	0.288224	0.256196	0.28715	0.277671	0.248466	0.285132	0.242738	0.264291	0.276083	0.278626	0.242106	0.261463	0.273943	0.271568	0.273194	0.230208	0.247045	0.263887	0.285792	0.259175	0.292121	0.238756	0.220914	0.21119	0.234061	0.226933	0.26996	0.274564	0.24524	0.246619	0.254975	0.23158	0.254074	0.244546	0.259095	0.240503	0.2426	0.224424	0.235893	0.284636	0.224737	0.242779	0.289188	0.257939	0.282083	0.255773
KEGG_GALACTOSE_METABOLISM	0.236913	0.242213	0.179982	0.229575	0.225795	0.237238	0.260408	0.216899	0.259534	0.247084	0.243243	0.271782	0.250294	0.244751	0.238433	0.234046	0.223082	0.235589	0.205183	0.227089	0.224001	0.230516	0.243308	0.242041	0.236123	0.226252	0.185562	0.211775	0.202001	0.232995	0.235405	0.240621	0.224016	0.22064	0.220964	0.21934	0.227515	0.239973	0.233212	0.228477	0.216903	0.204915	0.256089	0.225551	0.247773	0.241032	0.22091	0.203837	0.239084
KEGG_ASCORBATE_AND_ALDARATE_METABOLISM	-0.0575969	0.0194105	0.0322685	-0.0450693	-0.0661614	-0.0090748	0.0674569	-0.0477967	0.0551299	0.0108807	-0.0157916	-0.0738456	-0.0569506	-0.044696	-0.0219452	0.00409872	-0.0216808	0.043305	-0.126041	-0.00522916	0.0332483	0.0180046	-0.0280233	0.00347139	-0.0195966	-0.164647	-0.0592635	-0.0835204	-0.110187	-0.0364434	-0.0761683	-0.182487	-0.027526	-0.149167	-0.109775	-0.0477756	-0.0101795	0.0247154	-0.102408	0.0438549	-0.11042	-0.0299828	-0.164138	-0.114118	-0.135801	0.112157	-0.113373	-0.0281571	-0.155483
KEGG_FATTY_ACID_METABOLISM	0.210355	0.230863	0.260733	0.214125	0.22281	0.234732	0.258587	0.215324	0.231319	0.216073	0.222196	0.219171	0.256097	0.216283	0.220315	0.215113	0.188858	0.231463	0.199222	0.224426	0.193482	0.208063	0.222501	0.216826	0.214494	0.144853	0.198786	0.18027	0.186002	0.22999	0.174482	0.152362	0.261499	0.168081	0.189348	0.179953	0.220584	0.197568	0.213419	0.257847	0.212657	0.219506	0.208923	0.230517	0.227383	0.279011	0.199848	0.248368	0.176352
KEGG_STEROID_BIOSYNTHESIS	0.281838	0.280395	0.25887	0.243599	0.283691	0.320245	0.314416	0.291409	0.321049	0.312509	0.312765	0.307866	0.302257	0.25311	0.31173	0.401244	0.287005	0.33486	0.258767	0.305215	0.320753	0.296379	0.278502	0.325518	0.216052	0.259511	0.261686	0.268001	0.322865	0.340567	0.300452	0.248385	0.314673	0.313195	0.20278	0.239251	0.286305	0.334972	0.273691	0.242637	0.221058	0.30157	0.28274	0.272345	0.287927	0.338871	0.347235	0.351683	0.325473
KEGG_PRIMARY_BILE_ACID_BIOSYNTHESIS	0.0264645	-0.0411863	-0.0506059	-0.0037044	-0.0557459	-0.0360283	-0.0533931	-0.0595971	0.0154184	-0.0685236	0.0129025	-0.0531082	-0.0231433	-0.0602222	-0.0354323	-0.0516489	-0.0647011	-0.0688997	-0.0630112	-0.0573326	-0.0934111	-0.0381704	0.000272578	-0.0557608	-0.0826618	-0.0381736	-0.026269	-0.076093	-0.0387416	-0.0461275	-0.0204052	-0.0394443	0.0205783	-0.0646724	-0.0385472	-0.0756802	-0.040674	-0.103906	-0.00586122	-0.0234208	-0.00329338	-0.0263074	-0.0517097	-0.00258761	0.0131956	-0.0409586	-0.0575515	-0.00533557	-0.0292765
KEGG_STEROID_HORMONE_BIOSYNTHESIS	-0.0821267	-0.0593043	-0.0714364	-0.11541	-0.183672	-0.0671879	-0.0355088	-0.102919	-0.0537178	-0.107257	-0.0659533	-0.177701	-0.0756406	-0.132203	-0.088916	-0.0970334	-0.0982767	-0.0869672	-0.1147	-0.109451	-0.0823218	-0.0616624	-0.0890407	-0.0819101	-0.0957265	-0.195566	-0.110876	-0.119671	-0.16657	-0.123364	-0.126918	-0.229736	-0.0619119	-0.188734	-0.151043	-0.124325	-0.0991882	-0.0651061	-0.163556	-0.0768236	-0.147863	-0.109573	-0.164429	-0.168575	-0.167237	-0.0288783	-0.15394	-0.105675	-0.165766
KEGG_OXIDATIVE_PHOSPHORYLATION	0.372399	0.311908	0.299297	0.296762	0.314731	0.35048	0.364313	0.338659	0.345311	0.32358	0.363809	0.345588	0.40321	0.296923	0.33769	0.310839	0.311563	0.298822	0.313698	0.305255	0.287646	0.346688	0.305982	0.324831	0.337487	0.294641	0.327217	0.280946	0.307753	0.325551	0.330036	0.27106	0.36002	0.316774	0.359612	0.325216	0.337501	0.336193	0.313432	0.279755	0.317688	0.295958	0.354151	0.270923	0.29842	0.320125	0.291163	0.354965	0.301046
KEGG_PURINE_METABOLISM	0.152243	0.140927	0.154107	0.135003	0.157064	0.182794	0.171684	0.145092	0.168938	0.157694	0.17758	0.15265	0.193587	0.149973	0.166009	0.156672	0.148222	0.152568	0.151157	0.138601	0.156225	0.171032	0.140771	0.159504	0.129358	0.154991	0.159918	0.146558	0.146998	0.157222	0.154108	0.147411	0.136677	0.16488	0.187056	0.137787	0.159007	0.160402	0.137615	0.14763	0.137707	0.142774	0.157125	0.12785	0.158909	0.17254	0.170734	0.166943	0.149923
KEGG_PYRIMIDINE_METABOLISM	0.231906	0.21347	0.207381	0.190073	0.24271	0.280068	0.264038	0.239172	0.249535	0.243517	0.261175	0.240474	0.283742	0.230934	0.247213	0.226089	0.229295	0.245512	0.240982	0.218708	0.231478	0.243985	0.213841	0.23259	0.211932	0.241416	0.252767	0.236259	0.238776	0.242378	0.234463	0.218895	0.215117	0.253099	0.265317	0.229686	0.242222	0.259243	0.200154	0.207678	0.207713	0.213565	0.242227	0.193451	0.236351	0.249667	0.238615	0.243617	0.239129
KEGG_ALANINE_ASPARTATE_AND_GLUTAMATE_METABOLISM	0.148768	0.165514	0.143621	0.15853	0.170068	0.175115	0.206537	0.175278	0.142239	0.175786	0.201947	0.172871	0.210186	0.129322	0.180904	0.185626	0.132832	0.185405	0.148659	0.175541	0.164706	0.169596	0.159441	0.173379	0.160205	0.103821	0.163399	0.188476	0.118001	0.187007	0.15278	0.16098	0.152413	0.162913	0.191498	0.167056	0.168146	0.159039	0.142183	0.142246	0.170896	0.151404	0.148993	0.135544	0.171127	0.195554	0.182029	0.193419	0.149626
KEGG_GLYCINE_SERINE_AND_THREONINE_METABOLISM	0.00293508	0.000887775	0.0311308	0.0357811	0.0420946	0.0615633	0.0698746	0.0129597	0.052946	0.0709899	0.0847692	0.0350044	0.0930429	0.0458022	0.0522674	0.066132	0.0239359	0.0658715	0.00801253	0.0243433	0.0294924	0.0717895	0.0332388	0.0348438	-0.00013004	-0.0500274	-0.00224149	0.058186	0.0551768	0.0254267	0.0388146	0.00740193	0.0592745	0.0125573	0.029272	0.0257979	0.0313358	0.0235702	0.0134096	0.0124316	0.0466936	0.047496	0.0312214	0.0218791	-0.0239133	0.0759585	0.0457263	0.0511825	0.0217834
KEGG_CYSTEINE_AND_METHIONINE_METABOLISM	0.19178	0.194554	0.186599	0.205417	0.233844	0.220059	0.225067	0.198695	0.191759	0.232724	0.189814	0.220449	0.24055	0.206898	0.195461	0.210622	0.188512	0.21702	0.208054	0.192773	0.215473	0.211692	0.219168	0.220236	0.176772	0.171418	0.220269	0.203484	0.21913	0.241885	0.194083	0.204284	0.18508	0.219514	0.237497	0.18941	0.223738	0.206696	0.196849	0.211596	0.209348	0.197012	0.225671	0.204633	0.230809	0.237752	0.203026	0.226131	0.22111
KEGG_VALINE_LEUCINE_AND_ISOLEUCINE_DEGRADATION	0.257784	0.250327	0.276665	0.265013	0.265624	0.26502	0.282338	0.252072	0.243463	0.238821	0.26412	0.278424	0.294335	0.247311	0.259537	0.251564	0.229705	0.263747	0.220924	0.24744	0.225968	0.267987	0.240386	0.243806	0.280161	0.199224	0.251329	0.23735	0.221534	0.279449	0.231672	0.220082	0.277688	0.244701	0.243541	0.238494	0.262135	0.234331	0.245983	0.268987	0.230264	0.238589	0.244366	0.247197	0.240701	0.306934	0.258184	0.270124	0.225673
KEGG_VALINE_LEUCINE_AND_ISOLEUCINE_BIOSYNTHESIS	0.249022	0.259572	0.20016	0.27542	0.202216	0.279278	0.25486	0.218548	0.252653	0.260091	0.273008	0.293102	0.268921	0.281032	0.262248	0.251249	0.242438	0.270711	0.274407	0.263853	0.26066	0.275472	0.258178	0.25611	0.25788	0.195998	0.226432	0.310104	0.234974	0.294945	0.257012	0.254103	0.23385	0.317084	0.292779	0.29588	0.243364	0.224294	0.246081	0.275185	0.235087	0.244308	0.307182	0.277093	0.266903	0.296054	0.327993	0.220968	0.279914
KEGG_LYSINE_DEGRADATION	0.243001	0.285599	0.268872	0.295132	0.291227	0.254381	0.256362	0.266979	0.29207	0.289532	0.26524	0.289048	0.273874	0.299662	0.269198	0.295641	0.292765	0.319852	0.248407	0.298606	0.291803	0.296155	0.24775	0.278847	0.2748	0.260009	0.274408	0.278831	0.266625	0.311786	0.274392	0.289822	0.253225	0.289557	0.268793	0.274988	0.295138	0.284111	0.265731	0.292825	0.262055	0.279034	0.269313	0.284814	0.280347	0.299441	0.306697	0.265703	0.279877
KEGG_ARGININE_AND_PROLINE_METABOLISM	0.215507	0.219693	0.215275	0.207462	0.201566	0.245922	0.252289	0.223677	0.234994	0.223999	0.266066	0.257594	0.28241	0.245915	0.251994	0.23495	0.238067	0.269279	0.20918	0.207632	0.219193	0.216239	0.217807	0.268954	0.172025	0.170606	0.202882	0.22425	0.207971	0.227088	0.225504	0.203178	0.260602	0.215569	0.234226	0.19685	0.23265	0.257224	0.218388	0.224359	0.227768	0.2291	0.266336	0.191131	0.249162	0.255004	0.225153	0.253949	0.205102
KEGG_HISTIDINE_METABOLISM	0.0876703	0.0922475	0.0897011	0.0590307	0.0447184	0.0932508	0.100806	0.068809	0.112815	0.0637023	0.0845382	0.0768255	0.121172	0.0691049	0.0780345	0.0904208	0.0820007	0.0999047	0.0757686	0.109908	0.0615637	0.0846633	0.0618938	0.083146	0.0694092	0.0141272	0.0318609	0.0190073	0.0686002	0.102381	0.0494759	0.000778568	0.123604	0.0125527	0.0584041	0.0699647	0.130616	0.0896732	0.0804188	0.109052	0.0998822	0.0610656	0.0595232	0.0812154	0.102111	0.0993811	0.0713094	0.119318	0.0367519
KEGG_TYROSINE_METABOLISM	0.0515523	0.0812607	0.0604708	0.0157967	-0.0226796	0.0730255	0.091823	0.0474133	0.0659996	0.0462899	0.0418013	0.0236872	0.0759665	0.0211049	0.0665479	0.0601107	0.0472989	0.0619367	0.0307318	0.0597032	0.023745	0.0620347	0.0430258	0.0490446	0.0475981	-0.0219711	0.028281	0.00372712	0.0325026	0.020681	0.0263885	-0.0323858	0.118696	-0.00849845	0.0209503	0.00981687	0.043335	0.0416241	0.0311651	0.0889132	0.0464288	0.0412004	0.0234907	0.0397259	0.0391428	0.102697	0.0528823	0.0707489	-0.00401167
KEGG_PHENYLALANINE_METABOLISM	0.170831	0.191367	0.125517	0.119461	0.113133	0.14597	0.178609	0.159014	0.179809	0.145079	0.162127	0.143146	0.167163	0.13734	0.181636	0.189578	0.191865	0.18218	0.181536	0.196157	0.13557	0.160435	0.163141	0.171894	0.130683	0.0727704	0.14379	0.106771	0.173448	0.172477	0.179072	0.0962181	0.24724	0.114789	0.123902	0.133047	0.20673	0.177819	0.184042	0.217867	0.168497	0.174365	0.153313	0.171293	0.175992	0.180845	0.190108	0.210931	0.151128
KEGG_TRYPTOPHAN_METABOLISM	0.137268	0.118826	0.121834	0.116856	0.117255	0.128307	0.115698	0.103667	0.145955	0.120483	0.118192	0.13037	0.172273	0.11279	0.106153	0.131015	0.0953277	0.112214	0.0939455	0.129276	0.103895	0.108045	0.118614	0.0973858	0.0743321	0.0588885	0.0981698	0.0640152	0.0786977	0.136956	0.0856609	0.0497455	0.144208	0.0926792	0.116126	0.080216	0.149469	0.0869422	0.1381	0.163273	0.140691	0.112186	0.0888505	0.117047	0.106493	0.13153	0.114095	0.153834	0.0894049
KEGG_BETA_ALANINE_METABOLISM	0.180818	0.174606	0.17719	0.21701	0.177856	0.160434	0.175628	0.148011	0.174549	0.160499	0.191042	0.16536	0.202975	0.164062	0.16491	0.167568	0.122246	0.216385	0.144201	0.198157	0.167215	0.154303	0.167297	0.16692	0.183248	0.150036	0.171558	0.136825	0.137743	0.191389	0.158198	0.157364	0.196703	0.152355	0.161231	0.176432	0.211382	0.188767	0.195923	0.199109	0.168609	0.17502	0.161543	0.188189	0.188608	0.184928	0.16258	0.199463	0.145327
KEGG_TAURINE_AND_HYPOTAURINE_METABOLISM	-0.0779521	-0.0714205	-0.0580192	-0.0181115	0.0663029	-0.0799084	-0.0591733	-0.0726103	0.000320497	-0.10541	0.023584	-0.000740209	-0.0130886	-0.0478205	-0.0263225	-0.0541528	-0.0581184	-0.0225206	-0.0210623	-0.00135983	-0.0818352	-0.0589603	-0.0171577	0.0242712	0.00628423	-0.0742139	-0.0861441	-0.0217302	0.00373768	0.0166281	-0.00803382	0.00402256	-0.0240636	-0.0382875	-0.0729647	0.0140338	-0.0287227	-0.00916658	0.0166132	0.00608565	0.0139284	-0.0656144	-0.0142359	-0.00158099	-0.04424	-0.0119841	-0.020104	-0.0106359	-0.0334525
KEGG_SELENOAMINO_ACID_METABOLISM	0.164912	0.195412	0.202658	0.209923	0.25776	0.208757	0.225903	0.186438	0.204087	0.200065	0.228709	0.241054	0.257542	0.212281	0.192934	0.208122	0.155549	0.206922	0.189717	0.198395	0.175651	0.208774	0.188302	0.206046	0.208469	0.154427	0.176268	0.223093	0.200208	0.263103	0.200956	0.188628	0.194403	0.180688	0.184811	0.200006	0.184687	0.187142	0.191763	0.224347	0.2328	0.174512	0.188435	0.200045	0.224995	0.251108	0.217898	0.237861	0.208345
KEGG_GLUTATHIONE_METABOLISM	0.231566	0.28336	0.325429	0.247908	0.274681	0.361656	0.333091	0.26176	0.352424	0.277843	0.292931	0.237721	0.325473	0.263578	0.355872	0.314638	0.320982	0.303786	0.306706	0.28109	0.295276	0.305972	0.283569	0.314925	0.268975	0.197596	0.213557	0.257097	0.237852	0.281019	0.273089	0.198767	0.287727	0.209183	0.240505	0.269698	0.278993	0.302256	0.257121	0.278403	0.234252	0.229976	0.301223	0.243018	0.219342	0.329463	0.232635	0.314783	0.252829
KEGG_STARCH_AND_SUCROSE_METABOLISM	0.0252156	0.076664	0.0724306	0.0364677	-0.00165648	0.0444931	0.0627012	0.00384887	0.0676292	0.0384018	0.0268874	0.0239362	0.00316644	0.00985552	0.041608	0.0552377	0.0436238	0.06234	-0.000655853	0.0542506	0.0737739	0.0765472	0.0483554	0.0523442	0.0361958	-0.0176695	0.00877646	0.000670012	-0.0217766	0.00786335	0.0139875	-0.010503	0.0349734	-0.0242414	-0.0151304	0.032852	0.00469396	0.0517645	-0.00777826	0.0759723	-0.0138035	0.0255397	-0.0179663	0.0229355	0.0172532	0.10968	-0.00234563	-0.0134003	-0.00288812
KEGG_AMINO_SUGAR_AND_NUCLEOTIDE_SUGAR_METABOLISM	0.307055	0.262797	0.265573	0.266836	0.246706	0.289061	0.283725	0.247437	0.299031	0.253667	0.315242	0.264439	0.289559	0.236643	0.255888	0.281519	0.243637	0.22732	0.250377	0.257959	0.257692	0.273625	0.273102	0.275771	0.238926	0.264224	0.247719	0.252937	0.270365	0.23749	0.250908	0.216373	0.281406	0.248636	0.272128	0.248484	0.252203	0.270559	0.281518	0.233027	0.269072	0.239216	0.261981	0.267461	0.283718	0.301705	0.230625	0.274	0.271874
KEGG_GLYCOSAMINOGLYCAN_BIOSYNTHESIS_CHONDROITIN_SULFATE	0.116907	0.163481	0.122179	0.201419	0.188651	0.163138	0.0941862	0.137723	0.176972	0.164135	0.212435	0.134571	0.125415	0.149919	0.166833	0.180237	0.14533	0.11354	0.164957	0.184214	0.146751	0.140116	0.164489	0.190734	0.0753514	0.236168	0.133941	0.180914	0.12074	0.159279	0.226943	0.222166	0.165696	0.203711	0.162691	0.205994	0.152441	0.128455	0.219865	0.144118	0.170731	0.161968	0.182464	0.15912	0.114708	0.115384	0.235108	0.144327	0.140399
KEGG_GLYCOSAMINOGLYCAN_BIOSYNTHESIS_HEPARAN_SULFATE	0.0638194	0.100747	0.108385	0.128136	0.107065	0.104471	0.0827198	0.0832698	0.131952	0.108694	0.108574	0.133125	0.102435	0.103292	0.129229	0.117211	0.0946793	0.109692	0.0875821	0.124165	0.139416	0.121581	0.0859424	0.12113	0.124398	0.137106	0.0725162	0.0945268	0.0781296	0.0608871	0.120894	0.126259	0.107386	0.118228	0.0699509	0.111926	0.108159	0.0696794	0.11375	0.101063	0.0767132	0.117242	0.0657669	0.100457	0.0799979	0.117466	0.142152	0.0892939	0.0907725
KEGG_INOSITOL_PHOSPHATE_METABOLISM	0.135086	0.184529	0.189221	0.178104	0.191891	0.156649	0.154175	0.179068	0.163647	0.20543	0.149551	0.195285	0.129889	0.205901	0.191657	0.197775	0.223368	0.191912	0.202056	0.183391	0.181032	0.163118	0.201269	0.195464	0.214514	0.185357	0.189213	0.193567	0.166342	0.225187	0.179578	0.203395	0.168486	0.182538	0.182782	0.164514	0.186068	0.182067	0.196372	0.198099	0.19282	0.204417	0.18678	0.197456	0.194952	0.197262	0.199736	0.174994	0.216477
KEGG_PYRUVATE_METABOLISM	0.207595	0.236742	0.219038	0.223876	0.238235	0.231794	0.25911	0.201497	0.253568	0.231983	0.219889	0.22731	0.240064	0.21096	0.246008	0.246045	0.248223	0.261776	0.205716	0.247928	0.231206	0.245919	0.214018	0.243675	0.193368	0.171596	0.177556	0.174098	0.197304	0.258465	0.186874	0.176695	0.20702	0.222184	0.241369	0.18925	0.230827	0.238972	0.226362	0.19875	0.215377	0.191601	0.231047	0.198453	0.2152	0.259065	0.209333	0.256934	0.209251
KEGG_GLYOXYLATE_AND_DICARBOXYLATE_METABOLISM	0.253118	0.233671	0.245254	0.212879	0.241876	0.260903	0.270815	0.261136	0.250087	0.281094	0.291931	0.248219	0.293383	0.258476	0.243763	0.274491	0.237248	0.268186	0.247554	0.241116	0.235577	0.271008	0.242718	0.248549	0.238354	0.239581	0.276274	0.262879	0.251664	0.272939	0.257597	0.224367	0.22004	0.261119	0.294466	0.236955	0.231529	0.277308	0.225051	0.234134	0.247277	0.222848	0.263403	0.224613	0.254887	0.27547	0.239187	0.249441	0.258059
KEGG_PROPANOATE_METABOLISM	0.255889	0.242162	0.266857	0.266337	0.248624	0.234018	0.265333	0.227166	0.251851	0.218033	0.244182	0.244339	0.260113	0.233868	0.240327	0.242695	0.244156	0.276235	0.201956	0.259658	0.245094	0.255228	0.208479	0.245798	0.256852	0.190844	0.230444	0.202477	0.203266	0.282422	0.197079	0.205613	0.230114	0.242849	0.21953	0.20759	0.250731	0.253789	0.23762	0.240115	0.225865	0.213605	0.223129	0.226603	0.227998	0.278446	0.244427	0.271266	0.20699
KEGG_BUTANOATE_METABOLISM	0.179012	0.168612	0.181929	0.147277	0.181203	0.170449	0.214481	0.159032	0.175627	0.169235	0.152499	0.163647	0.217388	0.145467	0.164697	0.166072	0.164915	0.225539	0.140338	0.164593	0.171517	0.172293	0.151734	0.172093	0.168382	0.114757	0.136135	0.156034	0.137865	0.152359	0.1617	0.134593	0.190819	0.15076	0.158772	0.164956	0.179755	0.162111	0.148549	0.167458	0.125681	0.145923	0.160338	0.147534	0.146261	0.204976	0.166513	0.182237	0.15263
KEGG_ONE_CARBON_POOL_BY_FOLATE	0.171312	0.186165	0.213269	0.16811	0.218546	0.228442	0.229158	0.207352	0.191398	0.247274	0.206766	0.200601	0.244859	0.231973	0.206101	0.229025	0.226127	0.286914	0.220974	0.251571	0.257185	0.224857	0.196099	0.212462	0.220202	0.198962	0.220634	0.247911	0.214572	0.262639	0.201496	0.198586	0.161533	0.220749	0.25954	0.193197	0.207111	0.203975	0.167732	0.205479	0.205523	0.19041	0.195197	0.200312	0.230645	0.217352	0.216741	0.204679	0.194904
KEGG_FOLATE_BIOSYNTHESIS	0.152192	0.163472	0.159538	0.0674834	0.204355	0.150531	0.176834	0.158817	0.187185	0.16937	0.192105	0.171494	0.247095	0.068151	0.150446	0.152756	0.0848387	0.161682	0.152419	0.133358	0.156717	0.144095	0.106724	0.1787	0.077263	0.0910249	0.131528	0.0987891	0.143822	0.137962	0.129374	0.0784096	0.195062	0.151985	0.188051	0.119244	0.179374	0.128274	0.110541	0.134216	0.113228	0.0987116	0.105678	0.125472	0.129367	0.185119	0.108102	0.114424	0.131516
KEGG_RETINOL_METABOLISM	-0.115778	-0.0736553	-0.0495943	-0.145155	-0.173677	-0.0885507	-0.0423211	-0.0732063	-0.0813074	-0.128744	-0.156306	-0.12338	-0.086015	-0.155923	-0.099348	-0.116958	-0.107007	-0.0895288	-0.156854	-0.143573	-0.104255	-0.0880192	-0.0864386	-0.115564	-0.13145	-0.210306	-0.0993953	-0.149513	-0.141135	-0.17978	-0.128877	-0.213688	-0.0597434	-0.214729	-0.208125	-0.180353	-0.164361	-0.105869	-0.167143	-0.0724558	-0.175778	-0.0966965	-0.188686	-0.178	-0.195992	-0.0214325	-0.156883	-0.14104	-0.19535
KEGG_PORPHYRIN_AND_CHLOROPHYLL_METABOLISM	0.0861066	0.10118	0.131741	0.0591337	0.0450723	0.134585	0.151369	0.0731188	0.14718	0.122999	0.121117	0.0529257	0.0938162	0.0420643	0.108502	0.103235	0.0925869	0.110622	0.0398811	0.0976601	0.121344	0.131909	0.0639744	0.101068	0.0795667	-0.0277514	0.0916234	0.0424008	0.0333725	0.0632501	0.0665333	-0.0291978	0.0917529	0.0104177	0.0407231	0.0292175	0.105552	0.0847224	0.036321	0.105601	0.0330056	0.0749882	0.0164796	0.0215272	0.0160846	0.181597	0.0319405	0.0999233	0.0244865
KEGG_TERPENOID_BACKBONE_BIOSYNTHESIS	0.270582	0.218663	0.19556	0.177796	0.266173	0.257411	0.251629	0.249207	0.268818	0.23618	0.236734	0.247792	0.255346	0.19378	0.239442	0.300722	0.220818	0.269413	0.187463	0.225478	0.251267	0.293446	0.19066	0.237982	0.198141	0.178623	0.195246	0.226518	0.233581	0.24728	0.207622	0.216036	0.226657	0.254429	0.201206	0.186851	0.180539	0.308346	0.214522	0.183529	0.154877	0.194504	0.234658	0.2013	0.193792	0.297791	0.308448	0.27135	0.246557
KEGG_LIMONENE_AND_PINENE_DEGRADATION	0.357473	0.36971	0.394978	0.408671	0.379032	0.364895	0.397653	0.336362	0.38208	0.335664	0.372828	0.355735	0.370501	0.376375	0.340568	0.348948	0.343074	0.426133	0.340696	0.394714	0.374129	0.350808	0.341821	0.363794	0.340963	0.342602	0.328101	0.321416	0.324361	0.400674	0.316584	0.304027	0.364863	0.353097	0.357171	0.367185	0.410216	0.413364	0.372224	0.37972	0.342611	0.35728	0.352505	0.362297	0.370837	0.383078	0.326817	0.388772	0.322198
KEGG_NITROGEN_METABOLISM	0.0741939	0.00774192	0.0625218	0.00900961	0.00422558	0.0477142	0.0373577	0.0219785	-0.000962717	0.00217509	0.0594869	0.0342732	0.0880428	0.0335331	0.0306122	0.0164953	0.0139956	0.0202545	0.0285989	0.0256021	0.0343778	0.0912517	0.00697237	0.0287227	0.00882216	0.0105262	0.037126	-0.00620625	-0.0347956	0.0203842	-0.00954883	0.0329725	0.00714306	0.00455149	0.0222814	0.0453323	0.0264762	0.0733765	0.00172033	0.0373992	0.029815	0.0242836	0.0175788	-0.0143722	-0.023332	-0.00710722	0.0191948	0.0433163	0.0137034
KEGG_SULFUR_METABOLISM	0.0770982	0.0994581	0.0922801	0.0732671	0.0534823	0.087895	0.0823194	0.0843233	0.122077	0.0348016	0.101858	0.0773431	0.120055	0.0870657	0.0347719	0.0338366	0.0264131	0.069119	0.130031	0.0731101	0.02434	0.0636305	0.0980893	0.0266704	0.0552355	0.079192	0.0415083	0.122461	0.0818282	0.122897	0.0691467	0.0673331	0.130721	0.0577472	0.0760328	0.080898	0.0894129	0.0318369	0.117262	0.0892455	0.112708	0.0761485	0.0778818	0.127167	0.119157	0.0713496	0.101555	0.159785	0.0530694
KEGG_METABOLISM_OF_XENOBIOTICS_BY_CYTOCHROME_P450	-0.00589677	0.0572958	0.102498	-0.0563604	-0.0472789	0.0885564	0.121954	0.0300253	0.094529	0.0292504	0.0012988	-0.0564546	0.0614888	-0.0185708	0.0868266	0.056084	0.0655795	0.0625457	0.0275035	0.0145687	0.0305771	0.0515782	0.0327293	0.051511	-0.00206471	-0.137106	-0.024631	-0.0171542	-0.03297	-0.0216108	-0.00915817	-0.167134	0.0814692	-0.124061	-0.0867633	-0.00894172	0.0115392	0.0384647	-0.041049	0.0561455	-0.0564524	-0.0280404	-0.0286025	-0.055418	-0.09305	0.122292	-0.0609184	0.0114491	-0.0609905
KEGG_DRUG_METABOLISM_CYTOCHROME_P450	-0.037217	0.00386466	0.0639362	-0.0649155	-0.0882602	0.0388481	0.0650854	0.0298834	0.0441578	-0.0207266	-0.0547007	-0.0311062	0.0162026	-0.0546232	0.0387241	0.00349211	0.019076	0.00253954	-0.0297402	-0.0336944	-0.0177295	-0.00395456	-0.0255346	-0.00296328	-0.0274015	-0.165466	-0.0504552	-0.0772053	-0.049784	-0.0765899	-0.0415337	-0.180936	0.0598113	-0.140563	-0.134233	-0.0480844	-0.040813	-0.0142474	-0.0534342	0.0501027	-0.0766672	-0.0341122	-0.0946058	-0.0677613	-0.100909	0.0872626	-0.0684442	-0.0300984	-0.0944636
KEGG_DRUG_METABOLISM_OTHER_ENZYMES	0.0116611	0.0270975	0.0231782	-0.0300804	-0.0211466	0.0222979	0.0619955	0.0355977	0.0527186	0.0198719	0.0292451	-0.0155732	0.00322268	-0.0237496	0.0238049	0.00939685	0.0324178	0.0323057	-0.0104721	0.012094	0.029736	0.0254547	0.0109902	0.0369563	-0.00759125	-0.0479403	0.0153953	0.00831672	-0.0153617	-0.013581	-0.00180221	-0.0496258	0.0229151	-0.04742	-0.0356027	-0.0101154	0.0127859	0.0267242	-0.0133225	0.0395382	-0.025733	0.00832499	-0.0261486	-0.0414656	-0.0278951	0.0685823	-0.0212621	-0.0155494	-0.0193867
KEGG_BIOSYNTHESIS_OF_UNSATURATED_FATTY_ACIDS	0.228957	0.252001	0.244986	0.243666	0.254465	0.309841	0.259075	0.222444	0.282908	0.272093	0.25732	0.226364	0.276904	0.251654	0.261657	0.216351	0.247333	0.266299	0.23127	0.243564	0.271514	0.252866	0.259487	0.258975	0.208648	0.241468	0.151474	0.212115	0.245776	0.20747	0.212995	0.243358	0.22148	0.246576	0.225634	0.205558	0.219447	0.281651	0.22093	0.195592	0.223247	0.226509	0.277358	0.234768	0.252389	0.272118	0.278225	0.237217	0.262998
KEGG_ABC_TRANSPORTERS	0.013475	0.0747751	0.0996359	0.011861	0.0370577	0.0613871	0.0553542	0.0329308	0.0582444	0.076803	0.0439344	0.0601538	0.0286369	0.0532898	0.0612993	0.0698624	0.0946297	0.0777668	0.0585903	0.112098	0.0613601	0.0813235	0.0859401	0.0823274	0.0158594	-0.00239854	0.0337161	0.0211251	0.0185356	0.0393647	0.036699	-0.0116905	0.0447512	-0.0193436	0.043242	0.0420108	0.0492056	0.0222608	0.0729022	0.0352944	0.0619116	0.0644594	0.0586609	0.0673271	0.0686704	0.0951881	0.00311147	0.0544701	0.0434853
KEGG_RIBOSOME	0.530639	0.499898	0.497002	0.503212	0.509477	0.515551	0.517734	0.503883	0.507419	0.498856	0.52071	0.493927	0.535507	0.500786	0.515182	0.49486	0.486358	0.499116	0.499824	0.487407	0.504734	0.51845	0.486676	0.513947	0.519961	0.49262	0.517924	0.470713	0.502204	0.507468	0.489297	0.475331	0.507119	0.513273	0.514811	0.494931	0.510945	0.514138	0.504925	0.495605	0.517346	0.487479	0.509311	0.488327	0.508244	0.483569	0.507866	0.519656	0.490815
KEGG_RNA_DEGRADATION	0.31974	0.281719	0.299693	0.278152	0.305704	0.292954	0.294314	0.297275	0.283738	0.298079	0.294973	0.305362	0.332455	0.294081	0.288111	0.296564	0.268329	0.308765	0.285098	0.305331	0.312132	0.32416	0.260943	0.290456	0.303173	0.29844	0.302148	0.293395	0.301919	0.298365	0.269005	0.273966	0.266065	0.314688	0.3042	0.306133	0.292397	0.303346	0.233483	0.280496	0.263405	0.276286	0.294609	0.25634	0.283516	0.297457	0.292006	0.275411	0.276933
KEGG_RNA_POLYMERASE	0.277489	0.237952	0.248255	0.240859	0.291119	0.329231	0.328363	0.294773	0.303436	0.283055	0.302727	0.285985	0.339216	0.261886	0.2872	0.284666	0.257494	0.284042	0.262363	0.246433	0.260406	0.313626	0.245026	0.284006	0.273276	0.280057	0.326279	0.307053	0.298241	0.292274	0.298737	0.251424	0.270637	0.332367	0.3073	0.27153	0.286743	0.309845	0.22772	0.254391	0.244988	0.252718	0.293261	0.235673	0.26361	0.303993	0.28248	0.290303	0.272361
KEGG_DNA_REPLICATION	0.25181	0.250198	0.260611	0.234845	0.349849	0.336694	0.348639	0.285696	0.298678	0.342468	0.29338	0.307006	0.34429	0.361188	0.318487	0.304388	0.320615	0.380051	0.299918	0.288978	0.296716	0.34369	0.248845	0.274675	0.215351	0.274462	0.292973	0.320601	0.334828	0.329265	0.320941	0.302846	0.230367	0.324932	0.309824	0.276277	0.305621	0.314238	0.230021	0.258857	0.207792	0.266235	0.340163	0.242345	0.262155	0.354753	0.318457	0.284451	0.335497
KEGG_SPLICEOSOME	0.393772	0.375265	0.368953	0.371251	0.40921	0.392074	0.388272	0.394506	0.387697	0.405358	0.402164	0.391571	0.41236	0.403972	0.399679	0.395927	0.381325	0.413173	0.388901	0.399283	0.394227	0.409207	0.366166	0.393447	0.393785	0.392247	0.412018	0.403854	0.427422	0.409834	0.397402	0.380613	0.380328	0.409029	0.416171	0.405069	0.392879	0.404461	0.350628	0.387445	0.369694	0.383456	0.414857	0.361749	0.377399	0.39213	0.389655	0.387562	0.38126
KEGG_PROTEASOME	0.469725	0.429987	0.451272	0.406271	0.451134	0.465645	0.464379	0.428644	0.476419	0.4685	0.452628	0.445515	0.477888	0.424192	0.460065	0.449575	0.431489	0.432748	0.451717	0.446052	0.431381	0.437467	0.429447	0.431868	0.413273	0.437999	0.412004	0.371619	0.421286	0.446163	0.429987	0.413272	0.449925	0.415875	0.469467	0.406203	0.463861	0.443311	0.428779	0.424295	0.450152	0.405322	0.454899	0.396704	0.443593	0.438299	0.38667	0.454602	0.421378
KEGG_PROTEIN_EXPORT	0.44457	0.386048	0.416111	0.378014	0.382609	0.396096	0.397614	0.384765	0.411359	0.380816	0.411574	0.390385	0.412233	0.381505	0.399291	0.404486	0.36647	0.357696	0.39347	0.39133	0.400608	0.409052	0.377892	0.394418	0.372167	0.383337	0.381076	0.360749	0.401786	0.363471	0.356931	0.350074	0.396207	0.370207	0.408943	0.364103	0.390002	0.394048	0.379612	0.386482	0.428638	0.39568	0.384005	0.358624	0.400299	0.375755	0.352172	0.434537	0.374304
KEGG_PPAR_SIGNALING_PATHWAY	0.123025	0.102311	0.0800771	0.1026	0.0877679	0.0751477	0.0938571	0.0673872	0.0736582	0.0732661	0.0763495	0.0717853	0.104666	0.0537615	0.081671	0.0757658	0.0807341	0.0777095	0.0697225	0.082073	0.0495897	0.066879	0.131958	0.0845851	0.0958794	0.0628404	0.0595962	0.0855412	0.081116	0.080136	0.0840283	0.0826806	0.132018	0.0791102	0.0697897	0.0676494	0.0877306	0.0832796	0.120318	0.113115	0.0891082	0.0899831	0.0718116	0.1449	0.115612	0.108276	0.0778341	0.0784762	0.0871716
KEGG_BASE_EXCISION_REPAIR	0.234139	0.249108	0.227661	0.231012	0.288558	0.291371	0.303306	0.281917	0.26621	0.275143	0.273123	0.278778	0.322616	0.289278	0.274625	0.259058	0.272358	0.309197	0.26553	0.266521	0.246464	0.284357	0.225731	0.249982	0.263799	0.262063	0.268285	0.278576	0.294094	0.294434	0.295178	0.263766	0.240113	0.284464	0.293138	0.276018	0.280716	0.268147	0.215868	0.255744	0.229672	0.255685	0.285207	0.226891	0.271384	0.305206	0.270745	0.288298	0.266474
KEGG_NUCLEOTIDE_EXCISION_REPAIR	0.293815	0.251261	0.280604	0.247507	0.29636	0.291673	0.308276	0.269952	0.279398	0.288354	0.277939	0.283512	0.31389	0.294577	0.279471	0.274625	0.277719	0.327904	0.268452	0.273929	0.278402	0.316119	0.229824	0.253417	0.258045	0.275769	0.275087	0.274908	0.273262	0.263866	0.274638	0.261685	0.232768	0.289633	0.27886	0.275238	0.270974	0.278011	0.228655	0.245086	0.217599	0.249948	0.28209	0.224717	0.244869	0.304381	0.274903	0.265526	0.263547
KEGG_MISMATCH_REPAIR	0.259885	0.246431	0.26874	0.241814	0.313901	0.312129	0.333686	0.254903	0.27529	0.331461	0.299611	0.29466	0.309639	0.356297	0.294424	0.271689	0.306064	0.369357	0.287302	0.281562	0.300626	0.337092	0.245559	0.267854	0.226103	0.25619	0.261877	0.311984	0.306879	0.294448	0.289842	0.289928	0.225833	0.308312	0.283911	0.267027	0.306414	0.291178	0.21253	0.24118	0.197735	0.263858	0.308775	0.238422	0.235946	0.350942	0.293499	0.271228	0.290543
KEGG_HOMOLOGOUS_RECOMBINATION	0.12368	0.135389	0.129592	0.109695	0.218656	0.196751	0.226772	0.16373	0.165331	0.240978	0.172123	0.201179	0.233298	0.261233	0.181446	0.175299	0.194585	0.251399	0.170859	0.171688	0.186817	0.231639	0.13835	0.162713	0.140535	0.171781	0.190127	0.231004	0.215683	0.211678	0.190925	0.204453	0.10017	0.181797	0.183591	0.203073	0.191515	0.181838	0.104015	0.138611	0.118464	0.153047	0.201992	0.129679	0.147007	0.229584	0.195537	0.147452	0.183904
KEGG_MAPK_SIGNALING_PATHWAY	0.145661	0.161759	0.134107	0.156543	0.153337	0.1464	0.138088	0.153931	0.151354	0.145798	0.158864	0.133111	0.136576	0.146217	0.156252	0.153052	0.156551	0.152117	0.157162	0.150541	0.148476	0.131779	0.169797	0.152523	0.135909	0.155085	0.136841	0.149955	0.141574	0.143921	0.158918	0.158567	0.151886	0.154854	0.147126	0.159468	0.166123	0.163055	0.166628	0.170532	0.157215	0.165056	0.158251	0.176578	0.163703	0.139352	0.167276	0.142163	0.145167
KEGG_ERBB_SIGNALING_PATHWAY	0.231115	0.266487	0.226686	0.233716	0.245202	0.237679	0.229627	0.246618	0.244494	0.242516	0.234628	0.239713	0.228485	0.237254	0.257153	0.257098	0.266975	0.25831	0.264501	0.259119	0.264028	0.241406	0.257317	0.247878	0.244549	0.26199	0.259225	0.258938	0.250123	0.248124	0.264326	0.273623	0.235416	0.263665	0.224224	0.267313	0.253842	0.254236	0.262885	0.270178	0.252019	0.264248	0.242767	0.260379	0.259346	0.266432	0.266963	0.22835	0.274734
KEGG_CALCIUM_SIGNALING_PATHWAY	-0.00513294	-0.00153974	0.00924773	0.0120855	0.00210616	-0.0135087	-0.0141291	-0.00235284	-0.00501919	0.00375107	0.00438297	-0.00281127	-0.0219135	0.0154	0.00517542	0.00569051	0.0168525	-0.00306553	0.0119927	-0.000340017	0.00191377	-0.0251055	0.0215502	0.00043019	-0.0174067	0.00766809	-0.0147381	-0.00518896	0.000334313	0.00162106	0.0148427	0.0160306	0.0021952	0.0103959	-0.0143162	-0.00808395	-0.000556255	0.00516896	0.0193221	0.0119378	0.00308171	0.0246846	0.00846863	0.0114308	0.0142309	-0.0242735	0.0312897	0.00439638	0.0224175
KEGG_CYTOKINE_CYTOKINE_RECEPTOR_INTERACTION	0.0125157	-0.0186367	-0.0209291	-0.0155436	0.0108549	-0.02613	-0.0560483	-0.0207571	-0.00887528	-0.0198183	0.0109883	-0.0281797	-0.0095428	-0.0729247	-0.0275511	-0.0172628	-0.0528268	-0.0866754	0.020344	-0.033259	-0.0421709	-0.0890774	0.00732289	-0.0443251	-0.114905	-0.0097256	-0.0474653	-0.0449471	-0.0549239	-0.0411286	-0.0305355	-0.057892	0.00760822	-0.0509456	-0.0134259	-0.0150624	0.0120027	-0.0439904	0.0203298	-0.00406431	0.0318226	0.0159051	-0.0440289	0.00259589	-0.0125475	-0.0675153	-0.0214845	-0.00776768	-0.0408853
KEGG_CHEMOKINE_SIGNALING_PATHWAY	0.148281	0.154111	0.145797	0.146228	0.160252	0.147804	0.127199	0.141144	0.16195	0.179291	0.147194	0.155822	0.14244	0.122838	0.153132	0.178534	0.119183	0.115431	0.194112	0.152905	0.139849	0.105294	0.194874	0.136586	0.0858153	0.132017	0.129594	0.126921	0.13513	0.147671	0.136804	0.128704	0.171509	0.137716	0.162703	0.132656	0.181932	0.125578	0.177905	0.167226	0.208129	0.178659	0.136941	0.172544	0.159092	0.121413	0.135451	0.17001	0.150838
KEGG_PHOSPHATIDYLINOSITOL_SIGNALING_SYSTEM	0.14913	0.195438	0.186485	0.179624	0.212995	0.160089	0.166264	0.17916	0.173643	0.217336	0.153022	0.188904	0.123974	0.204892	0.193607	0.19932	0.219831	0.202922	0.206825	0.188772	0.182173	0.167696	0.21498	0.19578	0.205331	0.182707	0.168317	0.188807	0.181676	0.208775	0.192702	0.214494	0.18427	0.184056	0.176363	0.173667	0.183296	0.188924	0.207494	0.204582	0.200301	0.216251	0.194926	0.199955	0.185564	0.179254	0.20266	0.164214	0.226029
KEGG_NEUROACTIVE_LIGAND_RECEPTOR_INTERACTION	-0.217759	-0.234014	-0.201014	-0.201155	-0.221633	-0.21576	-0.24201	-0.229417	-0.237077	-0.237355	-0.220591	-0.239167	-0.241893	-0.225299	-0.227337	-0.212193	-0.232278	-0.246392	-0.231933	-0.222321	-0.230116	-0.236274	-0.216459	-0.225712	-0.264341	-0.222211	-0.22388	-0.249103	-0.238766	-0.229917	-0.210494	-0.232564	-0.218769	-0.232124	-0.246622	-0.25077	-0.218292	-0.24617	-0.218512	-0.219031	-0.232936	-0.214812	-0.236298	-0.217137	-0.219729	-0.242063	-0.214668	-0.231692	-0.23022
KEGG_CELL_CYCLE	0.277125	0.286568	0.288212	0.258435	0.335595	0.324195	0.317902	0.303825	0.298587	0.319728	0.289729	0.318641	0.314842	0.335604	0.323037	0.314977	0.316328	0.360904	0.327619	0.308273	0.325985	0.321068	0.298102	0.289007	0.252149	0.301588	0.324571	0.325401	0.328882	0.322261	0.311193	0.336452	0.261063	0.330974	0.316192	0.309733	0.32193	0.324876	0.265044	0.284858	0.248276	0.300924	0.335059	0.281561	0.279427	0.316882	0.332651	0.274823	0.3256
KEGG_OOCYTE_MEIOSIS	0.232894	0.228732	0.24193	0.222694	0.260578	0.243615	0.235751	0.242209	0.246089	0.258707	0.226753	0.249331	0.245214	0.254196	0.264008	0.244946	0.247708	0.268732	0.259859	0.252795	0.261344	0.25442	0.23956	0.229227	0.200128	0.232434	0.247358	0.246508	0.241073	0.250432	0.239806	0.260442	0.20925	0.249514	0.2434	0.230945	0.244892	0.247992	0.215281	0.234082	0.202891	0.230309	0.26071	0.234244	0.237027	0.242199	0.265709	0.22559	0.266953
KEGG_P53_SIGNALING_PATHWAY	0.289676	0.27202	0.276901	0.248328	0.318344	0.291675	0.281372	0.278272	0.27892	0.27971	0.282655	0.272368	0.303704	0.264507	0.286217	0.286807	0.262807	0.299715	0.339529	0.290643	0.298667	0.274968	0.291703	0.266205	0.260763	0.30635	0.267083	0.284756	0.29387	0.277336	0.277718	0.29211	0.287304	0.299722	0.27584	0.305764	0.29641	0.288158	0.27921	0.277521	0.243584	0.289537	0.274626	0.272204	0.250602	0.283197	0.266553	0.251079	0.282309
KEGG_UBIQUITIN_MEDIATED_PROTEOLYSIS	0.305327	0.316289	0.315814	0.30275	0.32969	0.300543	0.304657	0.318735	0.313045	0.314225	0.291576	0.32112	0.309981	0.315918	0.312617	0.315721	0.309456	0.314988	0.315915	0.320775	0.32185	0.324255	0.304827	0.307073	0.317408	0.306333	0.316149	0.30745	0.299751	0.317109	0.298237	0.311522	0.298576	0.324246	0.301315	0.319933	0.31824	0.305098	0.28981	0.299348	0.298622	0.305223	0.301166	0.301922	0.302118	0.319114	0.317771	0.296465	0.30682
KEGG_REGULATION_OF_AUTOPHAGY	0.057974	0.0394249	0.0408859	0.0312175	0.0673623	0.0475817	0.0376767	0.035856	0.0397691	0.000492063	0.00814772	0.0486169	0.0587982	0.0281664	0.036132	0.0367372	0.0426324	0.033367	0.0177685	0.05107	0.0212935	0.044338	0.0563649	0.0301076	0.0418345	0.00957483	0.0250874	-0.00144889	0.0355705	0.0557505	0.0321028	0.0267096	0.0251566	0.026161	0.017954	0.0460481	0.0491987	0.00763036	0.0268496	0.0363207	0.0256474	0.0154037	0.0465282	0.0235135	0.0432667	0.0289801	0.0167407	0.0498562	0.0303941
KEGG_ENDOCYTOSIS	0.261549	0.283739	0.25599	0.287515	0.272019	0.257163	0.258931	0.285392	0.271974	0.272224	0.274639	0.280918	0.254214	0.26553	0.281639	0.285058	0.276278	0.27557	0.295183	0.277642	0.264265	0.247764	0.29614	0.276134	0.274216	0.277376	0.275616	0.27681	0.28474	0.275772	0.279974	0.282931	0.284296	0.278947	0.280344	0.272361	0.289051	0.273661	0.294153	0.293519	0.291092	0.282341	0.275164	0.291144	0.291847	0.275482	0.28002	0.268228	0.293711
KEGG_PEROXISOME	0.204561	0.174981	0.193524	0.171797	0.179302	0.197834	0.206469	0.186203	0.197773	0.162021	0.203498	0.216686	0.221289	0.146836	0.175504	0.177787	0.177656	0.158794	0.172632	0.174771	0.164809	0.194318	0.163919	0.186152	0.22803	0.155461	0.181189	0.135848	0.16181	0.179975	0.149384	0.143859	0.214487	0.169067	0.191657	0.157668	0.179652	0.17152	0.170951	0.177844	0.174584	0.181408	0.189482	0.164807	0.194576	0.20925	0.171215	0.207878	0.164864
KEGG_MTOR_SIGNALING_PATHWAY	0.26903	0.292868	0.250784	0.297637	0.300117	0.285291	0.271144	0.281345	0.282966	0.295991	0.275522	0.27703	0.274275	0.292864	0.279403	0.296628	0.282936	0.299505	0.281698	0.292467	0.270936	0.286117	0.303601	0.283335	0.277212	0.28207	0.289587	0.292172	0.281151	0.304899	0.309133	0.328437	0.27783	0.286371	0.290704	0.299901	0.275145	0.273952	0.288255	0.313901	0.294734	0.304799	0.278471	0.30457	0.294346	0.30348	0.299895	0.293507	0.303002
KEGG_APOPTOSIS	0.241744	0.229331	0.232157	0.204872	0.262738	0.218696	0.213734	0.231981	0.244489	0.245933	0.230553	0.231773	0.229891	0.198713	0.234734	0.231406	0.206455	0.21388	0.269606	0.238214	0.238221	0.197288	0.235826	0.212145	0.209121	0.233242	0.224142	0.213406	0.20206	0.224216	0.217804	0.204646	0.239854	0.218716	0.205693	0.25246	0.249427	0.228045	0.239098	0.229416	0.242766	0.261973	0.204404	0.23997	0.253697	0.211767	0.222762	0.23599	0.215562
KEGG_VASCULAR_SMOOTH_MUSCLE_CONTRACTION	0.0985622	0.128709	0.126644	0.140944	0.115895	0.110914	0.112187	0.104791	0.118983	0.114543	0.131922	0.103253	0.0922523	0.136081	0.132637	0.132245	0.126457	0.107716	0.130362	0.122659	0.119644	0.101598	0.148523	0.126632	0.107021	0.129908	0.0946482	0.112046	0.128894	0.126306	0.137737	0.145873	0.13729	0.123547	0.118753	0.112537	0.120819	0.112816	0.152771	0.165888	0.141714	0.139964	0.104215	0.162137	0.142591	0.101794	0.169433	0.131675	0.138216
KEGG_WNT_SIGNALING_PATHWAY	0.172735	0.197957	0.192998	0.222988	0.166745	0.200114	0.183527	0.19747	0.183242	0.189159	0.191714	0.175994	0.158613	0.197196	0.202175	0.199705	0.224399	0.19995	0.192406	0.202236	0.217655	0.190799	0.204567	0.206933	0.179083	0.217919	0.190801	0.199613	0.192536	0.173818	0.215871	0.233707	0.197415	0.226443	0.189692	0.195228	0.195273	0.20067	0.202771	0.201674	0.178336	0.209276	0.187845	0.214841	0.180262	0.195952	0.215671	0.169904	0.204342
KEGG_DORSO_VENTRAL_AXIS_FORMATION	0.21022	0.2266	0.217774	0.242466	0.255977	0.186331	0.192268	0.218373	0.211266	0.2076	0.228112	0.222569	0.186996	0.218253	0.204196	0.236536	0.236483	0.227813	0.249938	0.236967	0.223166	0.181395	0.238441	0.206815	0.225513	0.245746	0.227885	0.224659	0.212017	0.227012	0.21628	0.24807	0.180442	0.245812	0.21556	0.240706	0.225545	0.222989	0.24963	0.246964	0.239921	0.250818	0.192192	0.240832	0.244371	0.201914	0.250486	0.190591	0.252938
KEGG_NOTCH_SIGNALING_PATHWAY	0.220695	0.273795	0.218065	0.28663	0.24698	0.263341	0.269115	0.262982	0.258293	0.276007	0.271515	0.291412	0.24289	0.284082	0.261821	0.275576	0.29042	0.289491	0.279887	0.280417	0.250147	0.254526	0.292349	0.278031	0.307597	0.320922	0.290759	0.306275	0.286447	0.290146	0.306307	0.301568	0.259405	0.28908	0.27817	0.29205	0.293493	0.268361	0.310468	0.289011	0.298599	0.296782	0.278606	0.295123	0.293225	0.292607	0.283374	0.268151	0.268081
KEGG_HEDGEHOG_SIGNALING_PATHWAY	-0.011728	0.0685197	0.0496807	0.124428	0.00320918	0.0575702	0.047881	0.0296794	0.0362534	0.045908	0.0618669	0.00351429	-0.00117843	0.0346677	0.0667527	0.0548318	0.10638	0.0858059	0.0279937	0.0460645	0.056824	0.0414261	0.0576312	0.0683541	0.0573324	0.0639546	0.00835672	0.0755158	0.0331548	0.00223923	0.0672274	0.0723231	0.068986	0.0761398	0.0180787	0.0634092	0.015545	0.0505751	0.0571843	0.0365768	0.00545719	0.0573354	0.0567054	0.070745	0.0194884	0.02563	0.0627369	-0.00548331	0.0518083
KEGG_TGF_BETA_SIGNALING_PATHWAY	0.182937	0.222653	0.20671	0.241856	0.185177	0.193613	0.172832	0.189794	0.18343	0.152932	0.205088	0.180076	0.182374	0.207085	0.19432	0.203367	0.187038	0.198962	0.184915	0.188939	0.209977	0.173823	0.210171	0.199656	0.181286	0.22954	0.186717	0.202794	0.187464	0.196247	0.192664	0.229385	0.174816	0.211777	0.203199	0.196859	0.205457	0.189824	0.222092	0.21777	0.184014	0.213214	0.178566	0.21352	0.185961	0.177468	0.22627	0.199029	0.206791
KEGG_AXON_GUIDANCE	0.163896	0.207244	0.180789	0.222703	0.175332	0.175506	0.1606	0.217878	0.174978	0.168973	0.204501	0.183585	0.155738	0.196345	0.192537	0.194509	0.192404	0.196521	0.198256	0.192134	0.189333	0.180601	0.215433	0.19898	0.195101	0.213512	0.182452	0.210923	0.192072	0.162941	0.220086	0.247888	0.218626	0.212317	0.181518	0.202126	0.214031	0.183791	0.217774	0.219515	0.19785	0.207568	0.182056	0.217956	0.178054	0.180718	0.23943	0.157316	0.21398
KEGG_VEGF_SIGNALING_PATHWAY	0.183227	0.21289	0.164164	0.206407	0.203034	0.210768	0.179887	0.214818	0.184311	0.197548	0.204987	0.202814	0.200784	0.203669	0.206508	0.197445	0.197856	0.187049	0.210225	0.195917	0.199765	0.180916	0.212079	0.192232	0.195604	0.204502	0.190819	0.205151	0.202598	0.204939	0.209136	0.21602	0.198687	0.203396	0.2137	0.201227	0.201183	0.208176	0.21242	0.224645	0.221118	0.228826	0.201723	0.219315	0.204034	0.200616	0.228934	0.212257	0.208109
KEGG_FOCAL_ADHESION	0.254388	0.294993	0.255562	0.332371	0.272931	0.268512	0.243793	0.287723	0.274078	0.253893	0.310725	0.243105	0.241407	0.286041	0.286077	0.294277	0.281583	0.268038	0.299882	0.300143	0.283146	0.245024	0.316485	0.291013	0.243135	0.3186	0.25875	0.286289	0.264516	0.279605	0.303597	0.332305	0.275439	0.308584	0.274417	0.293391	0.293218	0.279018	0.337613	0.319111	0.30489	0.304933	0.269989	0.328016	0.272565	0.268877	0.326611	0.251175	0.297456
KEGG_ECM_RECEPTOR_INTERACTION	0.221856	0.273569	0.212083	0.325348	0.233921	0.248859	0.216222	0.254267	0.246489	0.204683	0.29784	0.204971	0.209505	0.267646	0.261712	0.277027	0.257285	0.231178	0.266945	0.281005	0.256823	0.208769	0.297959	0.269829	0.174817	0.296643	0.216081	0.260648	0.238317	0.24747	0.270157	0.319883	0.240854	0.280263	0.23279	0.266582	0.256841	0.238996	0.336206	0.304526	0.267453	0.266854	0.240184	0.307386	0.223454	0.213242	0.319342	0.206948	0.282897
KEGG_CELL_ADHESION_MOLECULES_CAMS	0.167555	0.145653	0.16061	0.179541	0.19487	0.140636	0.100224	0.118354	0.141283	0.184129	0.158544	0.123967	0.128684	0.136162	0.144535	0.192837	0.0949774	0.0795838	0.179413	0.126622	0.103381	0.0650475	0.22051	0.137399	0.0499357	0.104519	0.104419	0.0794221	0.138349	0.146402	0.121593	0.107724	0.173677	0.103554	0.174009	0.0714615	0.185453	0.0787119	0.21437	0.171937	0.234466	0.182827	0.127324	0.187197	0.15781	0.119254	0.108896	0.161176	0.151657
KEGG_ADHERENS_JUNCTION	0.295227	0.343485	0.340075	0.360825	0.310944	0.313835	0.309404	0.354039	0.315774	0.322725	0.344447	0.325841	0.282134	0.357305	0.342603	0.353104	0.341935	0.339888	0.335056	0.343115	0.330161	0.32521	0.360412	0.343298	0.321161	0.343781	0.329211	0.343221	0.339057	0.336737	0.332214	0.360747	0.318539	0.350033	0.337105	0.333131	0.33792	0.341033	0.355645	0.36526	0.342289	0.341274	0.322803	0.360741	0.343485	0.339209	0.361743	0.297264	0.340875
KEGG_TIGHT_JUNCTION	0.169119	0.198114	0.188974	0.200688	0.208945	0.169915	0.187282	0.198532	0.17128	0.160066	0.190042	0.175903	0.153606	0.188483	0.198419	0.185955	0.19627	0.198649	0.210618	0.200339	0.180924	0.174532	0.208225	0.201048	0.197955	0.167891	0.183194	0.197447	0.196111	0.185394	0.192342	0.205775	0.213526	0.196046	0.191729	0.188336	0.204748	0.196772	0.209997	0.223828	0.211382	0.186639	0.187066	0.215138	0.202146	0.210573	0.189427	0.190602	0.205687
KEGG_GAP_JUNCTION	0.154609	0.185763	0.188596	0.212772	0.187712	0.181693	0.156658	0.176727	0.17661	0.170775	0.18363	0.163705	0.14634	0.188857	0.197963	0.19823	0.195351	0.176561	0.177087	0.199903	0.204661	0.176932	0.184378	0.182391	0.150062	0.206461	0.15312	0.179202	0.167362	0.181751	0.186449	0.22215	0.165002	0.200939	0.165199	0.186789	0.175169	0.174883	0.194069	0.185325	0.173966	0.18546	0.177662	0.201977	0.196222	0.175723	0.218336	0.188742	0.210733
KEGG_COMPLEMENT_AND_COAGULATION_CASCADES	0.14396	0.158344	0.121487	0.142375	0.047817	0.0800656	0.0770414	0.0845655	0.103555	0.0510049	0.131282	0.06942	0.116228	0.0560587	0.107439	0.120881	0.0573424	0.0665603	0.155331	0.0962873	0.0375429	0.0395124	0.180017	0.105463	-0.0130392	0.0846349	0.0906661	0.079595	0.0857077	0.0856637	0.110069	0.0575269	0.190946	0.0799289	0.168119	0.0405875	0.140987	0.0855071	0.201091	0.198354	0.212335	0.130635	0.0965913	0.226275	0.186004	0.0740256	0.0682263	0.194788	0.122569
KEGG_ANTIGEN_PROCESSING_AND_PRESENTATION	0.253801	0.206438	0.210685	0.22925	0.250546	0.223563	0.187932	0.196163	0.221866	0.263883	0.210581	0.208403	0.225538	0.194245	0.207717	0.245678	0.182863	0.162637	0.244968	0.198321	0.169236	0.115463	0.249008	0.184655	0.147726	0.17369	0.193457	0.126523	0.216719	0.227126	0.195294	0.167451	0.224419	0.177509	0.263451	0.121278	0.269355	0.152408	0.249294	0.219658	0.266213	0.229372	0.180723	0.226025	0.232347	0.19117	0.155824	0.220006	0.228722
KEGG_TOLL_LIKE_RECEPTOR_SIGNALING_PATHWAY	0.176188	0.160315	0.137106	0.145335	0.193841	0.159906	0.145809	0.14694	0.183535	0.192372	0.142471	0.160725	0.143361	0.115743	0.166659	0.169161	0.13805	0.121452	0.193757	0.14891	0.144889	0.110459	0.19119	0.145058	0.119687	0.141421	0.136844	0.122519	0.136994	0.158093	0.147615	0.110749	0.161153	0.127917	0.157066	0.142342	0.185681	0.136487	0.178301	0.154047	0.179872	0.182323	0.143459	0.161705	0.149349	0.123876	0.134515	0.169088	0.148389
KEGG_NOD_LIKE_RECEPTOR_SIGNALING_PATHWAY	0.225925	0.195392	0.164966	0.147941	0.198492	0.158498	0.173387	0.188086	0.199122	0.201971	0.18846	0.180533	0.157911	0.140367	0.196081	0.171248	0.169756	0.131272	0.224105	0.17972	0.176137	0.157038	0.185665	0.171504	0.141975	0.194923	0.162351	0.188736	0.154349	0.183569	0.154812	0.129301	0.192429	0.144834	0.15731	0.209499	0.21742	0.196245	0.191876	0.191571	0.21025	0.181837	0.170937	0.199713	0.166348	0.151884	0.16526	0.177765	0.163463
KEGG_RIG_I_LIKE_RECEPTOR_SIGNALING_PATHWAY	0.103092	0.119913	0.0642047	0.0667669	0.13786	0.0738146	0.0979826	0.119385	0.101744	0.140325	0.0604699	0.117582	0.0907633	0.0729694	0.106503	0.0918024	0.0864894	0.0792602	0.130784	0.102545	0.102283	0.0769001	0.116053	0.0951692	0.105304	0.105329	0.119195	0.0854167	0.0843566	0.122017	0.0951719	0.0626762	0.0857621	0.0865124	0.0894026	0.132202	0.123345	0.126612	0.11411	0.104499	0.12764	0.118681	0.0834654	0.104703	0.124857	0.0805322	0.0852114	0.116089	0.0966403
KEGG_CYTOSOLIC_DNA_SENSING_PATHWAY	0.104894	0.0754813	0.061914	0.0315879	0.103171	0.0699533	0.0653873	0.0869553	0.110934	0.125397	0.0702515	0.0825941	0.103426	0.0554665	0.091173	0.0736376	0.0676733	0.0400767	0.147388	0.0528043	0.0519312	0.0407533	0.107324	0.0667819	0.0560993	0.0931094	0.0702973	0.0724056	0.0661558	0.0999429	0.0685891	-0.0016441	0.108051	0.0387363	0.0931497	0.100015	0.12186	0.0852529	0.0818467	0.0667225	0.11232	0.104348	0.0954346	0.0700339	0.0953637	0.026773	0.0513717	0.0964415	0.0510863
KEGG_JAK_STAT_SIGNALING_PATHWAY	0.0747627	0.0721623	0.0605812	0.05288	0.0898501	0.0421438	0.0198324	0.0501557	0.0544177	0.0599839	0.0619416	0.0691035	0.048569	0.031726	0.051591	0.0648849	0.0527447	0.0154269	0.0887579	0.0577121	0.0398925	0.01931	0.0936394	0.0527608	0.0153346	0.0663635	0.0502236	0.0398222	0.0386033	0.0454625	0.052855	0.0527679	0.0574081	0.0527829	0.0517276	0.0588976	0.0772821	0.0383322	0.081096	0.0762071	0.090569	0.0888331	0.0250319	0.0891779	0.0750266	0.0428536	0.0642564	0.0556563	0.0510021
KEGG_HEMATOPOIETIC_CELL_LINEAGE	0.0779131	0.0591479	0.0544714	0.0616143	0.063056	0.0347064	0.000286718	0.0287555	0.0686802	0.0864297	0.0710565	0.041617	0.0411957	0.00841538	0.0545547	0.0781609	0.0124737	-0.0440704	0.0866735	0.038457	0.0058131	-0.0301045	0.112574	0.0386606	-0.0686835	0.0533779	0.0095173	0.00154209	0.0198939	0.0320821	0.00934046	-0.00448277	0.0751571	0.000225479	0.0768593	0.00195733	0.0956625	0.0195806	0.120577	0.0842948	0.13448	0.0910158	0.0424592	0.098288	0.0636713	0.00340821	0.0359606	0.0818323	0.0541081
KEGG_NATURAL_KILLER_CELL_MEDIATED_CYTOTOXICITY	0.128836	0.0900473	0.103922	0.0914429	0.136712	0.0958428	0.0743486	0.110154	0.112508	0.163199	0.0954166	0.110008	0.110957	0.0682384	0.0982067	0.12698	0.0748797	0.065829	0.144351	0.0961558	0.073496	0.0258435	0.140417	0.0804474	0.0716778	0.0893587	0.0891803	0.0768247	0.0997797	0.0993124	0.0997951	0.0815738	0.108811	0.0847482	0.138108	0.0953861	0.147312	0.0800488	0.136987	0.107403	0.161619	0.133565	0.0923167	0.111478	0.104719	0.0738698	0.085816	0.103538	0.123044
KEGG_T_CELL_RECEPTOR_SIGNALING_PATHWAY	0.198117	0.213896	0.183806	0.186578	0.237525	0.180814	0.180915	0.215297	0.209541	0.240719	0.195894	0.209252	0.195579	0.186376	0.209739	0.224678	0.204482	0.191171	0.245637	0.215093	0.185545	0.15938	0.24067	0.185697	0.178222	0.195306	0.203518	0.196307	0.210527	0.209969	0.207092	0.202108	0.199994	0.207932	0.228213	0.214253	0.247367	0.192986	0.227277	0.211142	0.255588	0.242115	0.191011	0.206582	0.206443	0.205639	0.200106	0.199528	0.215498
KEGG_B_CELL_RECEPTOR_SIGNALING_PATHWAY	0.248462	0.264109	0.224861	0.24475	0.274619	0.237756	0.223459	0.25017	0.249269	0.27968	0.234464	0.239941	0.224415	0.211494	0.258127	0.276906	0.22433	0.232521	0.283281	0.252265	0.217834	0.200119	0.299063	0.237681	0.220198	0.236041	0.224372	0.216243	0.249689	0.239559	0.251515	0.240667	0.258004	0.247003	0.257947	0.233224	0.280915	0.243713	0.281631	0.256812	0.326096	0.317329	0.236863	0.262018	0.250641	0.227572	0.225198	0.273972	0.265682
KEGG_FC_EPSILON_RI_SIGNALING_PATHWAY	0.134531	0.168038	0.137342	0.156488	0.164802	0.14631	0.142411	0.146797	0.141643	0.180245	0.142724	0.154384	0.141064	0.133368	0.162083	0.169668	0.137399	0.151909	0.172824	0.154808	0.139723	0.104008	0.186599	0.147277	0.150392	0.131967	0.141503	0.138788	0.147145	0.169412	0.147769	0.153077	0.14882	0.147665	0.167461	0.135165	0.167592	0.142967	0.183486	0.176584	0.194593	0.187414	0.139115	0.185423	0.16412	0.145496	0.155025	0.173421	0.163843
KEGG_FC_GAMMA_R_MEDIATED_PHAGOCYTOSIS	0.24795	0.28611	0.278226	0.28653	0.29468	0.269193	0.262336	0.274981	0.276287	0.307589	0.272164	0.278065	0.250872	0.260324	0.288283	0.317104	0.270039	0.27528	0.299866	0.285134	0.26563	0.240782	0.329748	0.276879	0.238458	0.265971	0.265637	0.266837	0.279798	0.290621	0.273659	0.280785	0.273598	0.26878	0.283768	0.249223	0.293864	0.264774	0.314852	0.291863	0.318985	0.29919	0.269224	0.307547	0.283498	0.259702	0.276133	0.28747	0.31009
KEGG_LEUKOCYTE_TRANSENDOTHELIAL_MIGRATION	0.217284	0.220428	0.185215	0.234325	0.230662	0.200255	0.193631	0.215167	0.194933	0.213011	0.213233	0.20112	0.187612	0.190754	0.218276	0.224162	0.187262	0.183385	0.248861	0.220422	0.180606	0.147765	0.26915	0.217433	0.171374	0.201554	0.196086	0.198411	0.217411	0.222038	0.220426	0.202569	0.241763	0.201079	0.227343	0.191062	0.231251	0.190958	0.270205	0.249584	0.287432	0.25732	0.206361	0.254451	0.225767	0.188626	0.206315	0.239999	0.225322
KEGG_INTESTINAL_IMMUNE_NETWORK_FOR_IGA_PRODUCTION	0.169181	0.0802711	0.107546	0.110176	0.143075	0.11284	0.0373957	0.0253684	0.111767	0.134873	0.0985328	0.0728286	0.100315	0.0395018	0.0819426	0.141737	0.0196239	-0.0267942	0.127572	0.0541297	-0.00849064	-0.0415665	0.164389	0.0528561	-0.0499706	0.0212265	0.0376163	-0.0373946	0.084237	0.101329	0.0616884	-0.00716633	0.126239	0.0160945	0.139969	-0.0634301	0.175489	-0.00770424	0.177579	0.111941	0.214211	0.130335	0.0272432	0.129647	0.110102	0.0443308	0.00813868	0.151263	0.0986548
KEGG_LONG_TERM_POTENTIATION	0.180799	0.183742	0.197789	0.207427	0.212162	0.189077	0.177888	0.204382	0.179631	0.201343	0.173903	0.190251	0.164354	0.205959	0.20641	0.19561	0.191925	0.188709	0.204878	0.197807	0.197823	0.193846	0.203483	0.181653	0.180701	0.19517	0.172768	0.179198	0.204197	0.185177	0.200669	0.223365	0.188099	0.20697	0.174414	0.188987	0.19736	0.191733	0.205813	0.199498	0.182395	0.20904	0.184668	0.19872	0.190242	0.179523	0.21128	0.188291	0.227093
KEGG_NEUROTROPHIN_SIGNALING_PATHWAY	0.251438	0.289812	0.26649	0.290265	0.305617	0.275208	0.266647	0.292145	0.267431	0.29021	0.273833	0.293152	0.262071	0.273448	0.281702	0.295124	0.286034	0.293926	0.294755	0.288389	0.285175	0.267539	0.292211	0.2763	0.283989	0.284295	0.268089	0.281168	0.288087	0.276461	0.295739	0.299841	0.27696	0.2942	0.262537	0.299947	0.277041	0.28776	0.295159	0.288234	0.285467	0.300741	0.267935	0.289378	0.268654	0.287995	0.293228	0.267039	0.291255
KEGG_LONG_TERM_DEPRESSION	0.0947197	0.130796	0.119096	0.117748	0.130841	0.124439	0.107574	0.113336	0.10229	0.123369	0.103946	0.11571	0.0955931	0.143799	0.139129	0.118991	0.1252	0.112076	0.124339	0.123717	0.125298	0.116632	0.132376	0.119657	0.105845	0.116571	0.102335	0.103878	0.114127	0.124674	0.111677	0.13196	0.1086	0.120557	0.105306	0.10234	0.1208	0.13091	0.123411	0.136082	0.123839	0.131336	0.111885	0.14055	0.13398	0.13053	0.14501	0.124366	0.149842
KEGG_OLFACTORY_TRANSDUCTION	-0.425468	-0.432775	-0.419564	-0.4344	-0.440281	-0.427323	-0.430538	-0.431837	-0.430092	-0.422783	-0.420243	-0.42119	-0.431969	-0.424024	-0.4343	-0.421981	-0.426514	-0.436414	-0.437437	-0.434308	-0.427151	-0.426153	-0.436943	-0.435483	-0.42173	-0.424686	-0.435945	-0.435682	-0.427181	-0.440029	-0.38131	-0.430401	-0.43689	-0.438	-0.443988	-0.424415	-0.441336	-0.430119	-0.439698	-0.427422	-0.442867	-0.434048	-0.433492	-0.443795	-0.447346	-0.441654	-0.430955	-0.44588	-0.432263
KEGG_REGULATION_OF_ACTIN_CYTOSKELETON	0.209307	0.237746	0.220568	0.258278	0.216392	0.218654	0.214797	0.22798	0.230063	0.231482	0.234701	0.208741	0.193557	0.232609	0.241841	0.244062	0.233918	0.225052	0.246548	0.24167	0.224969	0.206166	0.262989	0.241297	0.201997	0.240416	0.221354	0.228125	0.225504	0.234567	0.240925	0.260603	0.223825	0.237218	0.222899	0.225471	0.243914	0.225684	0.263144	0.248478	0.241826	0.246554	0.221915	0.260005	0.227203	0.212497	0.256277	0.206356	0.252823
KEGG_INSULIN_SIGNALING_PATHWAY	0.231759	0.253725	0.224319	0.254908	0.242491	0.238277	0.242894	0.248268	0.237203	0.251607	0.234801	0.256957	0.23234	0.250058	0.247292	0.259272	0.247771	0.255464	0.247524	0.250538	0.244055	0.247793	0.254459	0.247606	0.2513	0.238395	0.244856	0.253101	0.244723	0.240771	0.253253	0.264235	0.239392	0.255701	0.243306	0.253286	0.243611	0.246958	0.247912	0.259013	0.244928	0.255252	0.25185	0.253626	0.253518	0.257783	0.253157	0.237113	0.261343
KEGG_GNRH_SIGNALING_PATHWAY	0.151156	0.186641	0.165403	0.159491	0.168338	0.162239	0.159097	0.164829	0.161189	0.172566	0.15968	0.167588	0.146889	0.171158	0.185732	0.171391	0.188265	0.182702	0.173981	0.175359	0.188208	0.167817	0.183092	0.177498	0.169363	0.170247	0.157969	0.173138	0.178456	0.162439	0.181798	0.183375	0.164753	0.178199	0.151	0.178462	0.166885	0.180654	0.182633	0.187844	0.156327	0.185439	0.165942	0.189719	0.170982	0.158249	0.196902	0.167151	0.195401
KEGG_PROGESTERONE_MEDIATED_OOCYTE_MATURATION	0.199178	0.21771	0.210349	0.197577	0.231836	0.238067	0.217321	0.217474	0.236357	0.24955	0.212776	0.231642	0.214124	0.237485	0.252361	0.24901	0.234422	0.246438	0.228481	0.244075	0.248427	0.234192	0.22075	0.218087	0.174542	0.196498	0.231904	0.227476	0.201238	0.234876	0.221716	0.25049	0.18872	0.226729	0.228646	0.213263	0.232432	0.220511	0.192798	0.22368	0.192934	0.217161	0.232747	0.221074	0.206815	0.244313	0.244506	0.215336	0.230706
KEGG_MELANOGENESIS	0.100017	0.152399	0.143871	0.167474	0.132141	0.147044	0.140861	0.145167	0.132944	0.145434	0.151285	0.122012	0.104107	0.143774	0.154773	0.158142	0.164937	0.150704	0.131655	0.141171	0.164071	0.146445	0.146044	0.145862	0.123424	0.164121	0.112013	0.134383	0.140522	0.133938	0.177636	0.177595	0.155153	0.167225	0.132355	0.14135	0.12532	0.15262	0.154135	0.138213	0.123209	0.161054	0.142576	0.156219	0.122741	0.156571	0.16775	0.14127	0.166041
KEGG_ADIPOCYTOKINE_SIGNALING_PATHWAY	0.175291	0.183443	0.188562	0.182642	0.22004	0.195949	0.200931	0.19262	0.174194	0.201043	0.17539	0.184559	0.168589	0.169467	0.186144	0.191166	0.202443	0.195133	0.19418	0.202205	0.176101	0.171407	0.189979	0.174421	0.1853	0.164943	0.20611	0.175363	0.168049	0.199727	0.177372	0.180147	0.183707	0.189325	0.18385	0.175975	0.208884	0.187128	0.196655	0.218745	0.198264	0.190183	0.173828	0.209965	0.199333	0.213209	0.17882	0.205554	0.186208
KEGG_TYPE_II_DIABETES_MELLITUS	0.0569862	0.10154	0.0754253	0.0942908	0.0895129	0.0554257	0.067494	0.0684916	0.0691863	0.0879212	0.0742072	0.106495	0.0646201	0.0829029	0.0786201	0.102966	0.0851548	0.106749	0.0844957	0.0876446	0.075931	0.0648764	0.113691	0.0905897	0.0647183	0.0695147	0.0751832	0.0846408	0.0685458	0.090663	0.0971738	0.105345	0.0744273	0.109883	0.0674953	0.0741823	0.0449333	0.0782206	0.0910004	0.112658	0.100514	0.0927893	0.0969791	0.114947	0.1118	0.112303	0.0878089	0.0615765	0.0948279
KEGG_TYPE_I_DIABETES_MELLITUS	0.246034	0.14861	0.181132	0.200685	0.223668	0.163417	0.107954	0.111923	0.188383	0.223807	0.180878	0.140943	0.198128	0.101481	0.151358	0.206928	0.0976429	0.0587984	0.208368	0.137256	0.100837	0.0347424	0.204413	0.107742	0.042905	0.123765	0.112217	0.044527	0.149583	0.176299	0.13336	0.0918108	0.189293	0.0884743	0.227602	0.0731858	0.233462	0.0912564	0.222767	0.155935	0.254538	0.19031	0.134943	0.172114	0.181604	0.116422	0.0800866	0.182443	0.176537
KEGG_MATURITY_ONSET_DIABETES_OF_THE_YOUNG	-0.264778	-0.284216	-0.27087	-0.280243	-0.294773	-0.244412	-0.275277	-0.250176	-0.240553	-0.214683	-0.242849	-0.28342	-0.28043	-0.258357	-0.27224	-0.258086	-0.232533	-0.241978	-0.265138	-0.28875	-0.267749	-0.286652	-0.283434	-0.262054	-0.251803	-0.269673	-0.249766	-0.277947	-0.280145	-0.243061	-0.27148	-0.24303	-0.257704	-0.287325	-0.222536	-0.303827	-0.255971	-0.269976	-0.280802	-0.278238	-0.222608	-0.305556	-0.246776	-0.257975	-0.192707	-0.216198	-0.297815	-0.184533	-0.274602
KEGG_ALDOSTERONE_REGULATED_SODIUM_REABSORPTION	0.122341	0.158084	0.149535	0.187134	0.134984	0.129618	0.148836	0.147186	0.125821	0.135747	0.135294	0.157798	0.109219	0.153882	0.151565	0.171783	0.136758	0.172427	0.153668	0.148958	0.135499	0.118644	0.179754	0.150397	0.132495	0.108509	0.13141	0.151198	0.178555	0.132722	0.170906	0.152568	0.166863	0.156879	0.145146	0.113193	0.130173	0.133751	0.185288	0.202101	0.184117	0.20862	0.139655	0.180299	0.177696	0.172444	0.157018	0.165449	0.160458
KEGG_VASOPRESSIN_REGULATED_WATER_REABSORPTION	0.299172	0.308654	0.305004	0.332996	0.278438	0.2843	0.287497	0.29159	0.291819	0.287055	0.295665	0.293913	0.278678	0.28028	0.292972	0.297538	0.262955	0.291003	0.295032	0.309357	0.29958	0.286459	0.306168	0.289535	0.304905	0.279606	0.295098	0.286066	0.290079	0.279341	0.287884	0.285156	0.309261	0.284422	0.295511	0.271346	0.301191	0.276328	0.314302	0.323431	0.311269	0.298042	0.279136	0.331554	0.319216	0.287041	0.303214	0.312371	0.306268
KEGG_ALZHEIMERS_DISEASE	0.328761	0.290653	0.279139	0.273808	0.293886	0.301301	0.310395	0.308852	0.305884	0.294225	0.324235	0.306446	0.332423	0.267455	0.299169	0.28156	0.283211	0.267654	0.286782	0.282651	0.268826	0.298341	0.272	0.290503	0.294568	0.281769	0.287324	0.260026	0.277846	0.293391	0.301903	0.263531	0.32476	0.286699	0.302276	0.294274	0.314212	0.300774	0.293032	0.268409	0.277979	0.289891	0.310601	0.256256	0.27549	0.288751	0.283982	0.296774	0.288423
KEGG_PARKINSONS_DISEASE	0.382038	0.324639	0.323077	0.304067	0.338728	0.351876	0.367558	0.348719	0.355741	0.340784	0.361539	0.347662	0.409748	0.303944	0.34286	0.320098	0.322337	0.323487	0.321353	0.319404	0.298086	0.351505	0.31084	0.337353	0.351661	0.302585	0.337425	0.290655	0.311263	0.344191	0.335862	0.289462	0.371814	0.32004	0.35934	0.341047	0.356407	0.337876	0.323867	0.300157	0.333926	0.310612	0.362747	0.283142	0.320646	0.33877	0.304886	0.359333	0.311153
KEGG_AMYOTROPHIC_LATERAL_SCLEROSIS_ALS	0.183624	0.166376	0.171922	0.176816	0.204228	0.188785	0.162282	0.200143	0.177549	0.173985	0.180107	0.186285	0.179828	0.164247	0.194419	0.165392	0.194519	0.169012	0.181687	0.168179	0.193073	0.149915	0.166705	0.170794	0.171116	0.169022	0.172862	0.173811	0.155222	0.179354	0.182824	0.169548	0.208299	0.172489	0.19104	0.185539	0.19766	0.176492	0.179947	0.16457	0.162585	0.187125	0.171823	0.155521	0.194672	0.156014	0.156311	0.174678	0.159141
KEGG_HUNTINGTONS_DISEASE	0.322072	0.292347	0.286632	0.280683	0.304119	0.315589	0.329001	0.31291	0.314487	0.299622	0.316454	0.316519	0.348293	0.292505	0.308241	0.29618	0.293833	0.295451	0.289907	0.293592	0.280776	0.325972	0.282867	0.300495	0.313368	0.281188	0.307108	0.276892	0.296152	0.312904	0.308068	0.278836	0.322439	0.303818	0.32046	0.303565	0.316304	0.311223	0.295435	0.274384	0.301125	0.282677	0.318464	0.263563	0.293239	0.307636	0.294793	0.316512	0.292303
KEGG_PRION_DISEASES	0.272589	0.253546	0.223556	0.284733	0.222277	0.244326	0.222248	0.241037	0.274683	0.262806	0.275996	0.22899	0.243983	0.242292	0.278713	0.271897	0.247216	0.225931	0.274275	0.250066	0.223018	0.219352	0.282623	0.255157	0.158509	0.266733	0.231858	0.250323	0.248383	0.251605	0.257926	0.212491	0.292501	0.254904	0.247951	0.227679	0.269073	0.226807	0.282533	0.273718	0.276831	0.275233	0.289791	0.284563	0.266821	0.208984	0.259742	0.278204	0.252028
KEGG_VIBRIO_CHOLERAE_INFECTION	0.277006	0.278946	0.285729	0.297719	0.270498	0.293282	0.293874	0.286511	0.292372	0.294281	0.297091	0.31412	0.275146	0.270749	0.294188	0.300822	0.282942	0.254189	0.311931	0.293347	0.278151	0.274487	0.324945	0.293144	0.288722	0.28365	0.29783	0.283778	0.292985	0.28645	0.286716	0.281369	0.300508	0.285295	0.317755	0.280294	0.28163	0.288536	0.311959	0.283221	0.312348	0.301936	0.292606	0.310926	0.306502	0.291759	0.288148	0.329581	0.301658
KEGG_EPITHELIAL_CELL_SIGNALING_IN_HELICOBACTER_PYLORI_INFECTION	0.284445	0.304297	0.284473	0.279859	0.275106	0.296793	0.305397	0.309106	0.30093	0.298916	0.308822	0.306199	0.285244	0.271354	0.308034	0.300674	0.30084	0.277969	0.325221	0.304463	0.296761	0.282723	0.317628	0.300626	0.267463	0.299095	0.289749	0.296707	0.282529	0.293789	0.287395	0.268197	0.305838	0.284979	0.277331	0.307178	0.299863	0.305364	0.305354	0.307447	0.29619	0.303239	0.28884	0.305134	0.288341	0.295289	0.293705	0.29496	0.285661
KEGG_LEISHMANIA_INFECTION	0.311605	0.262559	0.261774	0.302703	0.29957	0.278724	0.228205	0.258906	0.269425	0.282381	0.27775	0.271339	0.278707	0.22532	0.265905	0.287155	0.205068	0.167722	0.298697	0.248876	0.210609	0.176853	0.325164	0.254227	0.179444	0.244383	0.230539	0.208943	0.259973	0.266872	0.239294	0.200324	0.279051	0.221426	0.275372	0.190053	0.302133	0.214512	0.32496	0.281457	0.32073	0.307508	0.246689	0.308117	0.270687	0.211106	0.211592	0.285239	0.289801
KEGG_PATHWAYS_IN_CANCER	0.200914	0.2446	0.225493	0.260542	0.233135	0.23435	0.220301	0.237935	0.225727	0.229912	0.246219	0.214914	0.210328	0.232871	0.24122	0.244173	0.250926	0.236059	0.243659	0.236576	0.240439	0.218278	0.252434	0.242615	0.220865	0.248679	0.220387	0.238481	0.228119	0.229029	0.254222	0.253517	0.236214	0.250541	0.217104	0.24325	0.23993	0.233564	0.250108	0.240519	0.232947	0.257596	0.228577	0.25568	0.219684	0.230351	0.255647	0.206277	0.241764
KEGG_COLORECTAL_CANCER	0.26978	0.305014	0.277485	0.313574	0.309255	0.299515	0.285856	0.306103	0.289167	0.303328	0.303333	0.291731	0.284001	0.312792	0.300593	0.325508	0.294466	0.307091	0.297217	0.307812	0.30757	0.275036	0.314492	0.297823	0.28293	0.299417	0.28439	0.290671	0.294028	0.308665	0.317632	0.324926	0.295267	0.313336	0.299205	0.295273	0.311858	0.285301	0.309269	0.30146	0.297722	0.319639	0.277087	0.307355	0.289118	0.300727	0.310408	0.285949	0.308012
KEGG_RENAL_CELL_CARCINOMA	0.322647	0.355773	0.340223	0.364881	0.341058	0.349881	0.327146	0.35469	0.349602	0.332488	0.355886	0.350952	0.328412	0.347366	0.354194	0.356702	0.345381	0.349184	0.354829	0.357159	0.350059	0.339119	0.364439	0.349821	0.334832	0.378127	0.329323	0.339567	0.339636	0.354864	0.364077	0.385544	0.334097	0.36875	0.330669	0.362583	0.349832	0.3433	0.359433	0.348438	0.347769	0.376017	0.337375	0.358964	0.337755	0.36575	0.356629	0.320093	0.361999
KEGG_PANCREATIC_CANCER	0.294695	0.327255	0.322838	0.323384	0.312409	0.320422	0.317539	0.325416	0.311631	0.323766	0.323925	0.298212	0.304435	0.321604	0.316111	0.337016	0.32933	0.336844	0.339013	0.325843	0.325906	0.299352	0.340403	0.311868	0.295154	0.337057	0.315304	0.312638	0.31942	0.310592	0.328733	0.333745	0.308121	0.329642	0.313701	0.325997	0.3324	0.331079	0.330723	0.313029	0.308983	0.341954	0.30747	0.320497	0.313318	0.313484	0.332052	0.302034	0.336572
KEGG_ENDOMETRIAL_CANCER	0.257701	0.301879	0.286178	0.312274	0.313491	0.284412	0.276331	0.312019	0.28129	0.29692	0.293929	0.303008	0.270989	0.310687	0.297361	0.314501	0.291221	0.312184	0.302278	0.309871	0.301234	0.266483	0.302754	0.290853	0.28429	0.306761	0.297933	0.295015	0.28483	0.303625	0.326022	0.342008	0.279419	0.31843	0.291601	0.307256	0.287069	0.290407	0.312835	0.309904	0.295183	0.325716	0.269422	0.31821	0.300098	0.31667	0.318964	0.273521	0.312307
KEGG_GLIOMA	0.259242	0.280292	0.273313	0.285762	0.283144	0.275567	0.269218	0.284365	0.263481	0.272794	0.282814	0.264117	0.244712	0.272884	0.274115	0.293919	0.277352	0.28405	0.31265	0.286499	0.288465	0.242315	0.305791	0.265712	0.250497	0.300974	0.259001	0.285906	0.296273	0.285021	0.300236	0.328202	0.259723	0.306286	0.255444	0.293561	0.274083	0.288773	0.29911	0.291127	0.267037	0.312395	0.28231	0.297684	0.250672	0.264308	0.307537	0.253849	0.314437
KEGG_PROSTATE_CANCER	0.248061	0.290369	0.288382	0.313982	0.296139	0.274655	0.265422	0.295836	0.275873	0.276776	0.295666	0.273375	0.254454	0.286338	0.291102	0.303336	0.271626	0.293079	0.300278	0.29175	0.294313	0.258174	0.2991	0.277341	0.258599	0.293506	0.27272	0.293987	0.288193	0.288457	0.307907	0.318263	0.264166	0.300172	0.266326	0.295467	0.270356	0.27311	0.295945	0.296876	0.283365	0.314545	0.265599	0.309579	0.280938	0.298626	0.310625	0.270267	0.308062
KEGG_THYROID_CANCER	0.279678	0.297777	0.302774	0.307797	0.314556	0.284053	0.309229	0.338473	0.310912	0.297613	0.314925	0.308837	0.304783	0.31744	0.318969	0.320922	0.320803	0.321165	0.312209	0.310411	0.323919	0.296293	0.3098	0.302659	0.328506	0.319259	0.319917	0.311629	0.301343	0.331607	0.348394	0.350172	0.291855	0.35243	0.343386	0.324663	0.304591	0.313655	0.306806	0.313607	0.308008	0.328801	0.29808	0.325826	0.309287	0.328132	0.325374	0.312257	0.328749
KEGG_BASAL_CELL_CARCINOMA	-0.0278973	0.0735476	0.0554408	0.148055	0.0239376	0.0671319	0.0629269	0.0580115	0.0443003	0.0602494	0.081802	0.00438805	-0.00350044	0.0627906	0.0746693	0.0643591	0.137501	0.097486	0.0221398	0.0495969	0.0882305	0.0519632	0.0590209	0.0710193	0.0728916	0.101203	0.0219861	0.0805917	0.02854	0.02011	0.114766	0.117692	0.08204	0.101706	0.0300267	0.0775971	0.024902	0.074447	0.0679416	0.0413493	0.0248497	0.0689434	0.0556342	0.0860933	0.0182	0.0535782	0.0764782	0.0117281	0.0579347
KEGG_MELANOMA	0.139663	0.15845	0.171099	0.198835	0.159588	0.168374	0.153821	0.160392	0.142465	0.142049	0.185197	0.115735	0.140313	0.174715	0.160995	0.182247	0.142861	0.15668	0.177138	0.168731	0.176363	0.137206	0.189332	0.163472	0.113061	0.173432	0.139022	0.1677	0.157996	0.159913	0.184796	0.197204	0.147885	0.179302	0.14649	0.164228	0.158583	0.153917	0.180799	0.169747	0.150404	0.187643	0.149633	0.191245	0.14086	0.17388	0.201715	0.141167	0.174239
KEGG_BLADDER_CANCER	0.31797	0.346352	0.311531	0.341314	0.340706	0.334014	0.347528	0.346334	0.340983	0.338994	0.341987	0.320879	0.347328	0.331817	0.335905	0.346972	0.339328	0.351395	0.37604	0.34055	0.332726	0.307598	0.351321	0.32688	0.307636	0.376437	0.34145	0.353067	0.374016	0.340078	0.373933	0.362118	0.335475	0.368215	0.355428	0.37251	0.34582	0.374523	0.358284	0.336675	0.321262	0.366375	0.356786	0.339523	0.327584	0.327328	0.359181	0.314902	0.373983
KEGG_CHRONIC_MYELOID_LEUKEMIA	0.301635	0.343686	0.318658	0.334403	0.33908	0.330713	0.328804	0.338298	0.32331	0.334431	0.334788	0.320066	0.314471	0.340292	0.332495	0.356588	0.339053	0.346971	0.365878	0.336762	0.339543	0.309545	0.355707	0.328802	0.337939	0.339907	0.348381	0.343268	0.34179	0.349879	0.344003	0.352962	0.326576	0.350821	0.326852	0.349018	0.355554	0.329532	0.349448	0.346728	0.343601	0.364584	0.317557	0.348849	0.334724	0.332714	0.356767	0.32251	0.355029
KEGG_ACUTE_MYELOID_LEUKEMIA	0.265734	0.312689	0.256459	0.30918	0.310554	0.293638	0.277138	0.296079	0.294541	0.312487	0.29207	0.304562	0.278604	0.295189	0.315861	0.318548	0.290031	0.286985	0.317786	0.30441	0.27995	0.260973	0.316929	0.302785	0.282001	0.293094	0.308521	0.293324	0.302234	0.311984	0.331016	0.32178	0.299889	0.317278	0.291644	0.295872	0.305495	0.276187	0.31976	0.316268	0.324889	0.327744	0.279088	0.319118	0.322587	0.308856	0.304388	0.296147	0.319226
KEGG_SMALL_CELL_LUNG_CANCER	0.247401	0.298478	0.278723	0.291677	0.307883	0.285011	0.271392	0.289332	0.276276	0.29237	0.29922	0.289788	0.280252	0.298198	0.28544	0.304143	0.303279	0.300192	0.323433	0.299872	0.306667	0.271484	0.306177	0.298754	0.265614	0.309682	0.288625	0.29548	0.284047	0.293857	0.30451	0.317046	0.275263	0.304323	0.2695	0.31383	0.296473	0.2946	0.301247	0.301196	0.282673	0.323093	0.275071	0.31329	0.272455	0.283042	0.317684	0.254336	0.297721
KEGG_NON_SMALL_CELL_LUNG_CANCER	0.240087	0.281112	0.270527	0.272698	0.289704	0.258711	0.275573	0.269024	0.259803	0.287578	0.264301	0.285407	0.233331	0.266717	0.264254	0.296774	0.285077	0.288865	0.30968	0.288929	0.28546	0.242926	0.291836	0.261573	0.258345	0.280237	0.288356	0.283502	0.291182	0.281502	0.288662	0.306301	0.256466	0.292705	0.274975	0.28919	0.27396	0.276991	0.297408	0.279043	0.27996	0.325419	0.256706	0.296321	0.25852	0.285519	0.298708	0.271133	0.310013
KEGG_ASTHMA	0.189704	0.0761328	0.140205	0.147817	0.15353	0.116386	0.0206408	0.0238305	0.100585	0.139767	0.0877838	0.072675	0.119483	0.0260676	0.080475	0.137734	-0.027839	-0.0783892	0.110414	0.0214962	-0.0276218	-0.0881422	0.159088	0.0355547	-0.0776694	-0.00858077	0.0230446	-0.0938535	0.094166	0.0781436	0.0341053	-0.0320587	0.11862	-0.00377352	0.128447	-0.108818	0.164818	-0.0407375	0.184819	0.0924704	0.176978	0.110973	0.0248366	0.116587	0.120779	0.0393	-0.0257228	0.107599	0.10703
KEGG_AUTOIMMUNE_THYROID_DISEASE	0.0944508	0.0140489	0.0423621	0.0618804	0.0914882	0.0365876	-0.0247134	-0.0215639	0.042972	0.0903212	0.0159226	0.0223853	0.0486336	-0.0155388	0.0176657	0.0641454	-0.0230993	-0.0800509	0.0655097	-0.0149675	-0.0491202	-0.125452	0.094833	-0.0198975	-0.0925374	-0.0368851	-0.010342	-0.111218	0.0259094	0.0421725	-0.000262417	-0.0402905	0.0440751	-0.0438463	0.0874453	-0.0992897	0.103154	-0.0751281	0.0922684	0.0261171	0.118258	0.0500907	-0.0341404	0.041222	0.0400805	-0.00740394	-0.0673853	0.0402681	0.0390001
KEGG_ALLOGRAFT_REJECTION	0.260336	0.161104	0.197671	0.20177	0.254379	0.187693	0.117715	0.113713	0.202378	0.257171	0.166861	0.167873	0.211594	0.120825	0.162677	0.224314	0.1042	0.0467816	0.216922	0.127318	0.0825592	-0.000613257	0.2401	0.119527	0.0419199	0.0962121	0.130938	0.00218494	0.165785	0.19507	0.130303	0.0745165	0.196461	0.0890655	0.248686	0.0328336	0.267792	0.0573877	0.248856	0.170891	0.28637	0.19796	0.106826	0.189531	0.198129	0.138647	0.0603237	0.187496	0.186392
KEGG_GRAFT_VERSUS_HOST_DISEASE	0.261063	0.152672	0.188064	0.174029	0.219848	0.177945	0.102367	0.0960446	0.211159	0.242343	0.170132	0.136113	0.189024	0.102081	0.171074	0.213686	0.11279	0.0385352	0.215942	0.119954	0.0967841	0.0143701	0.206196	0.104554	0.0171528	0.119166	0.104741	0.0211241	0.136151	0.165412	0.109559	0.0582684	0.177581	0.0761432	0.232992	0.0433839	0.243987	0.0779067	0.217442	0.161592	0.253349	0.183598	0.113335	0.173987	0.176487	0.104312	0.0578628	0.170875	0.169045
KEGG_VIRAL_MYOCARDITIS	0.281296	0.245606	0.255983	0.307643	0.278318	0.254394	0.210934	0.230151	0.248185	0.258312	0.253107	0.224122	0.236325	0.225926	0.25427	0.274007	0.212533	0.171285	0.265739	0.221621	0.195877	0.152852	0.304447	0.234872	0.172461	0.210294	0.218377	0.177196	0.249627	0.242468	0.233108	0.223736	0.270149	0.206157	0.285051	0.176989	0.297806	0.17702	0.317681	0.277606	0.31703	0.273499	0.216322	0.282355	0.262191	0.21801	0.217733	0.249437	0.270001
[truncated: 452 more columns]
